# Supplementary material
Source: bioRxiv or medRxiv preprint supplement (https://www.biorxiv.org/highwire/filestream/139118/field_highwire_adjunct_files/0/463711-1.pdf)

1 Supplemental information to:

2

3 **PETISCO is a novel protein complex required for 21U RNA biogenesis and embryonic viability**

4

5 Ricardo J. Cordeiro Rodrigues<sup>1</sup>, António Miguel de Jesus Domingues<sup>1</sup>, Svenja Hellmann<sup>1</sup>, Sabrina  
6 Dietz<sup>2</sup>, Bruno F. M. de Albuquerque<sup>1,3</sup>, Christian Renz<sup>4</sup>, Helle D. Ulrich<sup>4</sup>, Falk Butter<sup>2</sup>, René F. Ketting<sup>1</sup>

7

8 Institute of Molecular Biology (IMB), Ackermannweg 4, 55128, Mainz, Germany

9 <sup>1</sup>IMB, Biology of Non-coding RNA Group

10 <sup>2</sup>IMB, Quantitative Proteomics Group

11 <sup>3</sup>Graduate Program in Areas of Basic and Applied Biology, University of Porto, 4099-003 Porto,  
12 Portugal.

13 <sup>4</sup>IMB, Maintenance of Genome Stability Group

14 correspondence: r.ketting@imb.de

15

16 **Materials and Methods**

17

18 ***Caenorhabditis elegans* genetics and culture**

19 *Caenorhabditis elegans* strains were cultured at 20°C on OP50 bacteria according to  
 20 standard laboratory conditions <sup>1</sup> unless otherwise stated and with the exception of IP-LFQP  
 21 experiments. Material for IP-LFQP were grown at 20°C in OP50 high density plates <sup>2</sup> for two  
 22 generations and synchronized and plated in standard plates for the generation before  
 23 harvest, lest indicated otherwise. Bristol N2 strain was used as reference wild type strain.  
 24 Strain list of this study can be consulted below.

25

26

| Strain reference | Genotype                                                                                                                                                    | Usage                |
|------------------|-------------------------------------------------------------------------------------------------------------------------------------------------------------|----------------------|
| N2               | Wild Type                                                                                                                                                   | NGS; IP-LFQP and RIP |
| EG7833           | <i>oxTi559[Peft-3::tdTomato::H2B::unc-54 3'UTR + Cbr-unc-119] I; unc-119(ed3) III</i>                                                                       | CRISPR/Cas9          |
| EG7893           | <i>oxTi615[Peft-3::tdTomato::H2B::unc-54 3'UTR + Cbr-unc-119]; unc-119(ed3) III</i>                                                                         | CRISPR/Cas9          |
| EG8897           | <i>unc-119(ed3) III; oxTi947[Peft-3::GFP::2xNLS::tbb-2 3'UTR + Cbr-unc-119] V</i>                                                                           | CRISPR/Cas9          |
| HT1593           | <i>unc-119(ed3) III</i>                                                                                                                                     | miniMos Transgenes   |
| KK359            | <i>tofu-6(it20); unc-4(e120)/mnc1 dpy-10(e128) unc-52(e444) II.</i>                                                                                         |                      |
| QA137            | <i>tofu-6(yt2) II; ytEx100</i>                                                                                                                              |                      |
| RFK180           | <i>mjls144[Pmex-5::egfp::his-58::21UR-1_as::tbb-2(3'UTR)]; pid-1(xf14) II</i>                                                                               |                      |
| RFK182           | <i>pid-1(xf35) II</i>                                                                                                                                       | NGS                  |
| RFK183           | <i>pid-1(xf36) II</i>                                                                                                                                       |                      |
| RFK184           | <i>mjSi22[Pmex-5::mCherry::his-58::21UR-1_as::tbb-2(3'UTR)] I; pid-1(xf35) II</i>                                                                           | Microscopy           |
| RFK514           | <i>unc-119(ed3) III; ife-3(xf101); oxTi947[Peft-3::GFP::2xNLS::tbb-2 3'UTR + Cbr-unc-119]/ oxTi664[Peft-3::TdTomato::H2B::unc-54 3'UTR + Cbr-unc-119] V</i> |                      |
| RFK515           | <i>unc-119(ed3) III; ife-3(xf102); oxTi947[Peft-3::GFP::2xNLS::tbb-2 3'UTR + Cbr-unc-119]/ oxTi664[Peft-3::TdTomato::H2B::unc-54 3'UTR + Cbr-unc-119] V</i> | NGS                  |
| RFK523           | <i>pid-3(tm2417) I/hT2[bli-4(e937) let-?(q782) qIs48](I;III).</i>                                                                                           | NGS                  |
| RFK625           | <i>unc-119(ed3) III; xfls137[Ppid-3::pid-3::mCherry::Myc::pid-3(3'UTR); Cbr-unc-119] II.</i>                                                                | Microscopy           |
| RFK647           | <i>pid-1(xf14); mjls144[Pmex-5::egfp::his-58::21UR-1_as::tbb-2(3'UTR)] II; xfls117[Ppid-1::pid-1::mCherry::V5::pid-1(3'UTR); Cbr-unc-119] V</i>             | RNAi essay           |
| RFK679           | <i>pid-3(tm2417); xfls136[Ppid-3::pid-3::mCherry::Myc::pid-3</i>                                                                                            | IP-LFQP and          |

|        |                                                                                                                                                                                                                                                  |                        |
|--------|--------------------------------------------------------------------------------------------------------------------------------------------------------------------------------------------------------------------------------------------------|------------------------|
|        | (3'UTR); <i>Cbr-unc-119</i> ] I                                                                                                                                                                                                                  | RIP                    |
| RFK684 | <i>xfIs123</i> [ <i>Ptofu-6::tofu-6::GFP::HA::tofu-6</i> (3'UTR); <i>Cbr-unc-119</i> ] V                                                                                                                                                         | Microscopy             |
| RFK696 | <i>xfIs121</i> [ <i>Pife-3::3xFLAG::mCherry::ife-3::ife-3</i> (3'UTR) + <i>Cbr-unc-119</i> ] II; <i>ife-3</i> ( <i>xf101</i> ); <i>oxTi947</i> [ <i>Peft-3::GFP::2xNLS::tbb-2</i> 3'UTR + <i>Cbr-unc-119</i> ] V                                 | IP-LFQP and RIP        |
| RFK697 | <i>xfIs121</i> [ <i>Pife-3::3xFLAG::mCherry::ife-3::ife-3</i> (3'UTR) + <i>Cbr-unc-119</i> ] II; <i>xfIs123</i> [ <i>Ptofu-6::tofu-6::GFP::HA::tofu-6</i> (3'UTR) + <i>Cbr-unc-119</i> ] V                                                       | Microscopy             |
| RFK700 | <i>xfIs136</i> [ <i>Ppid-3::pid-3::mCherry::Myc::pid-3</i> (3'UTR); + <i>Cbr-unc-119</i> ] I; <i>xfIs123</i> [ <i>Ptofu-6::tofu-6::GFP::HA::tofu-6</i> (3'UTR) + <i>Cbr-unc-119</i> ] V                                                          | Microscopy             |
| RFK701 | <i>xfIs136</i> [ <i>Ppid-3::pid-3::mCherry::Myc::pid-3</i> (3'UTR); + <i>Cbr-unc-119</i> ] I; <i>pid-1</i> ( <i>xf35</i> ) II                                                                                                                    | IP-LFQP                |
| RFK703 | <i>bnIs1</i> [ <i>Ppie-1::GFP::pgl-1</i> + <i>unc-119</i> (+)], <i>xfIs136</i> [ <i>Ppid-3::pid-3::mCherry::Myc::pid-3</i> (3'UTR) + <i>Cbr-unc-119</i> ] I                                                                                      | Microscopy             |
| RFK721 | <i>tofu-6</i> ( <i>it20</i> ), <i>unc-4</i> ( <i>e120</i> ) II; <i>xfIs123</i> [ <i>Ptofu-6::tofu-6::GFP::HA::tofu-6</i> (3'UTR) + <i>Cbr-unc-119</i> ] V                                                                                        | IP-LFQP                |
| RFK742 | <i>xfIs167</i> [ <i>Perh-2::erh-2::EGFP::OLLAS::erh-2</i> (3'UTR) + <i>Cbr-unc-119</i> ] I; <i>erh-2</i> ( <i>xf168</i> ), <i>oxTi615</i> [ <i>eft-3p::tdTomato::H2B::unc-54</i> 3'UTR + <i>Cbr-unc-119</i> ]; <i>unc-119</i> ( <i>ed3</i> ) III | IP-LFQP and Microscopy |
| RFK810 | <i>erh-2</i> ( <i>xf168</i> ); <i>oxTi615</i> [ <i>Peft-3::tdTomato::H2B::unc-54</i> 3'UTR + <i>Cbr-unc-119</i> ]/ <i>qC1</i> [ <i>dpy-19</i> ( <i>e1259</i> ) <i>glp-1</i> ( <i>q339</i> ) <i>qls26</i> ] III                                   | NGS                    |
| RFK861 | <i>tost-1</i> ( <i>xf191</i> ); <i>oxTi615</i> [ <i>Peft-3::tdTomato::H2B::unc-54</i> 3'UTR + <i>Cbr-unc-119</i> ] III                                                                                                                           |                        |
| RFK874 | <i>pid-3</i> ( <i>xf149</i> ), <i>oxTi559</i> [ <i>Peft-3::tdTomato::H2B::unc-54</i> 3'UTR + <i>Cbr-unc-119</i> ] III/ <i>hT2</i> [ <i>bli-4</i> ( <i>e937</i> ) <i>let-?</i> ( <i>q782</i> ) <i>qls48</i> ](I;III)                              |                        |
| RFK875 | <i>pid-3</i> ( <i>xf153</i> ), <i>oxTi559</i> [ <i>Peft-3::tdTomato::H2B::unc-54</i> 3'UTR + <i>Cbr-unc-119</i> ] III/ <i>hT2</i> [ <i>bli-4</i> ( <i>e937</i> ) <i>let-?</i> ( <i>q782</i> ) <i>qls48</i> ](I;III)                              |                        |
| RFK876 | <i>pid-3</i> ( <i>xf151</i> ), <i>oxTi559</i> [ <i>Peft-3::tdTomato::H2B::unc-54</i> 3'UTR + <i>Cbr-unc-119</i> ] III/ <i>hT2</i> [ <i>bli-4</i> ( <i>e937</i> ) <i>let-?</i> ( <i>q782</i> ) <i>qls48</i> ](I;III)                              |                        |
| RFK905 | <i>tost-1</i> ( <i>xf194</i> ), <i>oxTi615</i> [ <i>Peft-3::tdTomato::H2B::unc-54</i> 3'UTR + <i>Cbr-unc-119</i> ] III/ <i>qC1</i> [ <i>dpy-19</i> ( <i>e1259</i> ) <i>glp-1</i> ( <i>q339</i> ) <i>qls26</i> ] III                              | NGS                    |
| RFK912 | <i>tost-1</i> ( <i>xf196</i> ), <i>oxTi615</i> [ <i>Peft-3::tdTomato::H2B::unc-54</i> 3'UTR + <i>Cbr-unc-119</i> ] III                                                                                                                           | Temperature Shift      |

27

## 28 Mutant generation with CRISPR/Cas9 system

29 Mutant alleles were generated as described in <sup>3</sup>. gRNAs were selected under the criteria:  
30 NGG PAM site, highest GC content and specificity according to CRISPRdirect <sup>4</sup> and Zhang  
31 Lab's <http://crispr.mit.edu>. Two to three gRNA, singularly cloned into Addgene plasmid  
32 #46169, were injected (35ng/μl) together with Addgene plasmid #46168 (50ng/μl) and co-

33 injection marker pRR83 (5ng/μl) into adult worms (specific strains below). F1 worms positive  
 34 for pharynx GFP expression were isolated, allowed reproduction, lysed in single worm lysis  
 35 buffer (5 mM KCl, 2,5 mM MgCl<sub>2</sub>, 10 mM Tris pH=8,3, 0,45% IGEPAL, 0,45% Tween-20,  
 36 0,01% gelatin) and genotyped for mutations using NEB Taq DNA Polymerase (M0273X)  
 37 according to manufacturer's instructions. Isolated mutants were outcrossed at least two  
 38 times before balancing.

39

| Target        | CRISPR/Cas9 Guide RNA |
|---------------|-----------------------|
| <i>ife-3</i>  | GCCTCCGTGCCGGGATTCGA  |
| <i>ife-3</i>  | GACACCCCTCCAGAATCGC   |
| <i>ife-3</i>  | GAGCCCAGCGATTCTGGAGG  |
| <i>pid-3</i>  | gaaaATGGTTGCCATCAGA   |
| <i>pid-3</i>  | GTGGAAGAATGTGCACGACG  |
| <i>pid-3</i>  | GGCGGATTTCAAGTCGAAAT  |
| <i>erh-2</i>  | gtgagaattattatgtttaa  |
| <i>erh-2</i>  | GAGCAGCTGATTTCTTGAA   |
| <i>erh-2</i>  | GAAGATCATCATAGAAACAT  |
| <i>tost-1</i> | GATAGTTctgaaacataacc  |
| <i>tost-1</i> | GAGCTTCTTCTCATCAGTAG  |
| <i>tost-1</i> | GATGGCAGTAGTCATtctga  |

40

#### 41 **miniMos transgene insertion and mapping**

42 Random miniMos insertions were made through injection of unc-119(ed3) carrying worms.  
 43 *C. briggsae* unc-119 was used as a selection marker. Injections and mapping were made in  
 44 accordance to <sup>5</sup>.

45

#### 46 **Immunostaining**

47 Adult worms were dissected in Egg Buffer (25mM HEPES pH 7,4, 118mM NaCl, 48mM KCl,  
 48 2mM EDTA, 0,5mM EGTA) with 1%(v/v) Tween20 and fixed 5 minutes by adding 1:1 Egg  
 49 Buffer+2% formaldehyde followed by a wash step in Egg Buffer. Cuticle was then removed  
 50 by Freeze cracking <sup>6</sup>. An extra fixation step of 1 minute in -20°C Methanol preceded three  
 51 washes in PBS (137mM NaCl, 2,7mM KCl, 10mM Na<sub>2</sub>HPO<sub>4</sub>, 2mM KH<sub>2</sub>PO<sub>4</sub>, pH=7,5) with  
 52 0,5%(v/v) Tween20 (PBST). After 1 hour in blocking buffer (PBST+10% Bovine Serum)  
 53 samples were co-stained overnight at 4°C with 1:200 dilutions of RFP-Booster\_Atto647N  
 54 (Chromotek, rba647n-10) and GFP-Booster\_Atto488 (Chromotek, gba488-10). Staining was  
 55 followed with multiple PBST washes and samples were mounted in ProLong Gold Antifade  
 56 Mountant (ThermoFisher Scientific, P36930).

57

#### 58 **Microscopy**

59 Wide-field fluorescence microscopy images were obtained using a Leica DM6000B and  
 60 Confocal microscopy images were acquired with a Leica TCS SP5. Images were processed  
 61 using Leica LAS software, ImageJ and Adobe Photoshop.

62



63 **RNAi experiments**

64 HT115(DE3) bacteria carrying Timmons and Fire L4440 RNAi feeding vector <sup>7</sup> were grown  
65 over 10 hours and seeded directly onto RNAi plates (standard NGM; 1mM IPTG+and;  
66 50µg/mL ampicillin). HT115(DE3) with empty L4440 or carrying *pid-3* or *tost-1* targeting RNA  
67 were taken from the Ahringer RNAi library <sup>8</sup>. Remaining vectors were made by inserting  
68 cDNA of its corresponding gene into L4440 and then retransformed into HT115(DE3).  
69 RFK647 worms were synchronized at L1 larvae and seeded into RNAi plates containing  
70 induced bacteria. Worms were imaged in adulthood and harvested for RNA collection.  
71 Experiment was repeated three independent times.

72

73 **RNA isolation**

74 *C. elegans* were collected off plate and washed with M9 buffer(22mM KH<sub>2</sub>PO<sub>4</sub>, 42mM  
75 Na<sub>2</sub>HPO<sub>4</sub>, 85mM NaCl, 1mM MgSO<sub>4</sub>) followed by a wash with ultrapure water and lysis in  
76 Worm Lysis Buffer (0,2M NaCl, 0,1M Tris pH=8,5, 50mM EDTA, 0,5% SDS) with 1mg/mL  
77 Proteinase K (Sigma-Aldrich, P2308) for 30 minutes at 65°C. After pelleting and removing  
78 debris, three volumes of TRIzol LS (ThermoFisher Scientific, 10296-028) were added to  
79 sample and RNA precipitation was carried out according to producer's instructions with the  
80 aid of Phase lock Gel – Heavy tubes (QuantaBio, 2302830). Eluted RNA samples were  
81 depleted of DNA using TURBO DNA-free Kit (Ambion, AM1907).

82 RNA Immunoprecipitation samples (see below) were obtained by adding TRIzol LS directly to  
83 IP beads after washes. The remaining isolation follows the previously described process.

84

85 **RT-qPCR**

86 Cultured worms and RNA samples were isolated as described above. Reverse transcription  
87 for each sample was performed with 500ng of total RNA using ProtoScript First Strand cDNA  
88 Synthesis Kit (NEB, E6300) and Oligo d(T)<sub>23</sub>VN. qPCR 10µl reactions were set up with iTaq  
89 Universal SYBR Green Supermix (Bio-Rad, 1725121), 500mM primer concentration and a  
90 volume ratio of 1/5 cDNA. PCR cycles and measurements were made in an Applied  
91 Biosystems ViiA7 Real Time PCR System (ThermoFisher Scientific). Cycling conditions were  
92 made according to iTaq manufacture's recommendations: Standard run, temperature  
93 increments of 1,6°C/s; 95°C for 30 seconds, 40 cycles of 95°C for 15 seconds and 60°C for 1  
94 minute; melt curve calculation: 15 seconds at 95°C, 1 minute at 60°C, temperature  
95 increments of 0,05°C/s to 95°C and hold for 15 seconds. Technical duplicates and biological  
96 triplicates were used.  $\Delta\Delta$ CT method was used as an analysis method <sup>9</sup>. *pmp-3* was used as a  
97 normalization factor <sup>10</sup>. Error bars represent the standard deviation of three biological  
98 replicates. Used primers are listed below.

99

| Target            | Sequence              |
|-------------------|-----------------------|
| <i>pmp-3</i> _Fw  | GTTCCCGTGTTCACTCAT    |
| <i>pmp-3</i> _Rev | ACACCGTCGAGAAGCTGTAGA |
| <i>GFP</i> _Fw    | ATGGTGTTCAATGCTTCTCG  |
| <i>GFP</i> _Rev   | TGACTTCAGcacgtgTCTTGT |

100

101 **Yeast two hybrid**

102 Two-hybrid assays were performed in the haploid strain PJ69-4a and the pGAD and pGBD  
 103 plasmid series as described previously<sup>11</sup>. Cell pinning was performed with Rotor HAD (Singer  
 104 Instruments, ROT-001).

105 **Temperature shift assay**

106 RFK912 worms were cultured at 15°C in standard plates. At the start of experiment they  
 107 were selected and singled into standard plates at L4 larvae stage. After overnight (O/N)  
 108 culture at 15°C or 25°C individual worms were transferred into a new plate and shifted to  
 109 corresponding temperature together with the plate of O/N egg lay. Every 2 hours individuals  
 110 were transferred into a new plate. Eggs were counted in each of these plates on the day of  
 111 egg lay and two days after larvae were counted for survival assay. As control we include  
 112 RFK912 worms which underwent the same treatment except with no temperature shift and  
 113 transferred into new plates every 4 hours.

114  
 115 **Small RNA Library preparation and sequencing**

116 NGS library prep was performed with NEXTflex Small RNA-Seq Kit V3 following Step A to Step  
 117 G of Bioo Scientific's standard protocol (V16.06). Libraries starting amount and PCR cycles  
 118 can be consulted in the table below. Amplified libraries were purified by running an 8% TBE  
 119 gel and size-selected for 18 – 40nt. Libraries were profiled in a High Sensitivity DNA on a  
 120 2100 Bioanalyzer (Agilent technologies) and quantified using the Qubit dsDNA HS Assay Kit,  
 121 in a Qubit 2.0 Fluorometer (Life technologies). Samples of each individual experiment were  
 122 pooled in equimolar ratio.

123

| Experiment   | Sample (each 3x)       | Starting Material | PCR cycles | Equipment                | Run type                                                                      |
|--------------|------------------------|-------------------|------------|--------------------------|-------------------------------------------------------------------------------|
| <i>pid-3</i> | <i>pid-3(tm2417)</i>   | 1000ng            | 15         | NextSeq 500 Flowcell     | Highoutput 75-cycle-kit, SR for 1x 83 cycles plus 7 cycles for the index read |
|              | <i>pid-3(tm2417)/+</i> | 1000ng            | 15         | NextSeq 500 Flowcell     | Highoutput 75-cycle-kit, SR for 1x 83 cycles plus 7 cycles for the index read |
| <i>ife-3</i> | <i>ife-3(xf102)</i>    | 500ng             | 15         | NextSeq 500/550 Flowcell | SR for 1x 75 cycles plus 7 cycles for the index read                          |
|              | N2                     | 500ng             | 15         | NextSeq 500/550 Flowcell | SR for 1x 75 cycles plus 7 cycles for the index read                          |
| <i>erh-2</i> | <i>erh-2(xf168)</i>    | 500ng             | 15         | NextSeq 500/550 Flowcell | SR for 1x 75 cycles plus 7 cycles for the index read                          |
|              | <i>erh-2(xf168)/+</i>  | 500ng             | 15         | NextSeq 500/550 Flowcell | SR for 1x 75 cycles plus 7 cycles for the index read                          |

|               |                      |        |    |                      |                                                                                |
|---------------|----------------------|--------|----|----------------------|--------------------------------------------------------------------------------|
|               | <i>tost-1(xf194)</i> | 2000ng | 12 | NextSeq 500 Flowcell | Midoutput 150-cycle-kit, PE for 2x 75 cycles plus 16 cycles for the index read |
| <i>tost-1</i> | <i>pid-1(xf35)</i>   | 2000ng | 12 | NextSeq 500 Flowcell | Midoutput 150-cycle-kit, PE for 2x 75 cycles plus 16 cycles for the index read |
|               | N2                   | 2000ng | 12 | NextSeq 500 Flowcell | Midoutput 150-cycle-kit, PE for 2x 75 cycles plus 16 cycles for the index read |

124

## 125 **Biochemistry**

126 **Worm preparation** Synchronized non-gravid adult worms were collected off plate  
 127 and washed with M9 buffer followed by a wash with ultrapure water. Pellets were frozen  
 128 with liquid nitrogen and kept at -80°C until usage.

129 **Lysate preparation** Worm Pellets were thawed on ice and mixed 1:1 with 2x Lysis  
 130 Buffer (20 mM Tris.Cl, 300 mM NaCl, 1 mM EDTA, 1%(v/v) IGEPAL CO-630, pH 7,5) with 2x  
 131 protease inhibitors (cOmplete Mini, EDTA-free, Roche, 11836170001). Bioruptor Plus  
 132 (Diagenode) sonicator was used to lyse worms (10 cycles 30/30 seconds, 4°C, high energy)  
 133 and debris removed by spinning. Lysate protein concentration was determined with Pierce  
 134 BCA Protein Assay Kit (ThermoFisher Scientific, 23225).

135 **Immunoprecipitations** Lysates were diluted in 1x Lysis Buffer+ 1x Protease inhibitors  
 136 to a final concentration of 1,5 mg of protein/mL and a total of 0,75 mg of protein was used  
 137 per IP. At this step input samples were collected into 2x NuPAGE LDS Sample buffer (Life  
 138 Technologies, NP0007)+ 200 mM DTT and boiled for 10 minutes. Anti-mCherry IPs were  
 139 performed with RFP-Trap\_MA beads (Chromotek, rtma-20) and anti-GFP IPs with GFP-  
 140 Trap\_MA beads (Chromotek, gtma-20), in both cases 25  $\mu$ L of bead slurry was used and  
 141 samples were rotated at 4°C for 2 hours. Subsequent washes were made with Wash Buffer  
 142 (10 mM Tris.Cl, 150 mM NaCl, 0,5 mM EDTA, pH 7,5)+ Protease inhibitors in accordance with  
 143 Chromotek protocols. Washed beads were resuspended in 2x NuPAGE LDS Sample Buffer +  
 144 200 mM DTT and boiled for 10 minutes, making the samples ready for loading.

145 **RNAse treated immunoprecipitations** followed the above described protocol with an  
 146 additional RNAse A/T1 Mix (ThermoFisher Scientific, EN0551) treatment step. After lysate  
 147 dilution samples were divided in two (Control and +RNAse) and 20  $\mu$ L of RNAse A/T1 mix was  
 148 added per 1 mL of +RNAse sample. Control and +RNAse samples were rotated for 20 minutes  
 149 at 4°C and followed by the described IP protocol.

150 **Western blot** Inputs an IP samples were loaded into 4-12% gradient gels  
 151 (ThermoFisher, NP0321BOX) and run with 1x NuPAGE MES SDS Running Buffer  
 152 (ThermoFisher, NP0002). Transfer to an Immobilon PVDF, 0,45  $\mu$ m membrane (Merck  
 153 Millipore, IPVH00010) was executed with 1x NuPAGE Transfer Buffer (ThermoFisher  
 154 Scientific, NP0006) 20%(v/v) Methanol. Membrane was probed with rabbit anti-PID-1 Q5941  
 155 <sup>12</sup> and detected with Amersham ECL Select Western Blotting Detection Reagent (GE  
 156 Healthcare, RPN2235). Background recognition by anti-PID-1 ab is used as loading control.

157 **Endogenous PID-1 Immunoprecipitations** 200  $\mu$ L of synchronized adult worms were  
158 resuspended in 500  $\mu$ L of IP lysis buffer (25 mM Tris pH 7,5, 150 mM NaCl, 1,5 mM MgCl<sub>2</sub>, 1  
159 mM DTT, 0,1% Triton X-100, complemented with 2x protease inhibitor) and sonicated at 4°C  
160 for 10 cycles of 30/30 seconds, high intensity using a Bioruptor Plus (Diagenode). Cell debris  
161 was removed via spinning and 30  $\mu$ L of washed Dynabeads Protein G (Life Technologies,  
162 1004D) and 10  $\mu$ L of anti-PID-1 antibody (Q5941) was added to the lysates and incubated  
163 under rotation for 3 hours at 4°C. The beads were then washed 3x 5 minutes in wash buffer  
164 (25 mM Tris pH 7,5, 150 mM NaCl, 1,5 mM MgCl<sub>2</sub>, 1 mM DTT, complemented with 2x  
165 protease inhibitor) and resuspended in 30  $\mu$ L of NuPAGE LDS buffer.

166 **Mass Spectrometry** Samples were separated on a 4–12% gradient Bis-Tris gel  
167 (ThermoFisher, NP0321) in MOPS SDS Running Buffer (ThermoFisher, NP0001) at 180 V for  
168 10 minutes, afterward separately processed by in-gel digest<sup>13 14</sup> and desalted using a C18  
169 StageTip<sup>15</sup>. The digested peptides were separated on a 25cm reverse-phase capillary (75 $\mu$ m  
170 inner diameter) packed with Reprosil C18 material (Dr. Maisch). Separation of the peptides  
171 was done with the EASYnLC 1000 system (Thermo) along a 2 hour gradient increasing from 2  
172 to 40% Buffer B. For PID-1 IPs the gradient was shortened to 90 minutes. Measurement was  
173 done on a Q Exactive Plus mass spectrometer (Thermo) operated with a Top10 data-  
174 dependent MS/MS acquisition method per full scan<sup>16</sup>. Measurements were processed with  
175 MaxQuant version 1.5.2.8<sup>17</sup> using the wormbase protein fasta database (version WS265)  
176 and standard settings except LFQ quantitation and match between runs were activated. The  
177 mass spectrometry proteomics data have been deposited to the ProteomeXchange  
178 Consortium via the PRIDE partner repository with the dataset identifier PXD011500.

179

180

## 181 **RIPseq**

182 **Lysate preparation** Worm Pellets were thawed on ice and mixed 1:1 with 2x Lysis  
183 Buffer (20 mM Tris.Cl, 300 mM NaCl, 1 mM EDTA, 1%(v/v) IGEPAL CO-630, pH 7,5) with 2x  
184 protease inhibitors (cOmplete Mini, EDTA-free, Roche, 11836170001) and 2x SUPERase.In  
185 RNase Inhibitor (Ambion, AM2696). Bioruptor Plus (Diagenode) sonicator was used to lyse  
186 worms (10 cycles 30/30 seconds, high energy). Lysate protein concentration was determined  
187 with Pierce BCA Protein Assay Kit (ThermoFisher Scientific, 23225). Lysates were diluted in 1x  
188 Lysis Buffer+ 1x Protease inhibitors+ 1x SUPERase.In RNase Inhibitor to a final concentration  
189 of 1,5 mg of protein/mL and a total of 2,1 mg of protein was used per IP. Each lysate was  
190 cleared with 225  $\mu$ L of Binding Control magnetic agarose beads (Chromotek, bmab-20) for 1  
191 hour at 4°C.

192 **Immunoprecipitation** Quadruplicate anti-mCherry RIPs were performed with RFP-  
193 Trap\_MA beads (Chromotek, rtma-20). 75  $\mu$ L of bead slurry per sample blocked for 1 hour  
194 with Blocking Buffer [2% (w/v) BSA, 2,5 mg/mL tRNA from *E.coli* MRE 600 (SigmaAldrich,  
195 10109541001), 10 mM Tris.Cl, 150 mM NaCl, 0,5 mM EDTA, pH 7,5] and washed with Wash  
196 Buffer (10 mM Tris.Cl, 150 mM NaCl, 0,5 mM EDTA, pH 7,5). Inputs from cleared lysates  
197 were taken and mixed 3:1 with TRIzol. 75  $\mu$ L of blocked bead slurry was added to the

198 remaining cleared lysate and samples were rotated at 4°C for 2 hours. Subsequent washes  
199 were made with Wash Buffer+ Protease inhibitors. Washed beads were resuspended in 100  
200  $\mu$ L of Nuclease free water and immediately mixed with 400  $\mu$ L of TRIzol.

201 **RppH treatment** A sample of each RNA sample was collected and treated with RNA 5'  
202 Pyrophosphohydrolase (RppH) (NEB, M0356) for the purpose of removing 5'Cap structures  
203 <sup>18</sup>. Each was treated in ThermoPol Buffer (20 mM Tris.Cl, 10 mM (NH<sub>4</sub>)<sub>2</sub>SO<sub>4</sub>, 10 mM KCl, 2  
204 mM MgSO<sub>4</sub>, 0,1% Triton X-100, NEB, B9005) for 1 hour at 37°C with 10 units of RppH.  
205 Reaction was stopped by adding EDTA to 10 mM and heating to 65°C for 5 minutes. RNA was  
206 purified by ethanol precipitation.

207 **Library preparation and Sequencing** NGS library prep was performed with NEXTflex  
208 Small RNA-Seq Kit V3 following Step A to Step G of Bioo Scientific's standard protocol  
209 (V16.06). Libraries were prepared with a starting amount of 100 ng and amplified in 18 PCR  
210 cycles. Amplified libraries were purified by running an 8% TBE gel and size-selected for 18 –  
211 40nt. Libraries were profiled in a High Sensitivity DNA on a 2100 Bioanalyzer (Agilent  
212 technologies) and quantified using the Qubit dsDNA HS Assay Kit, in a Qubit 2.0 Fluorometer  
213 (Life technologies). Total amount of samples were divided in two pools. Each pool was mixed  
214 in equimolar ratio and sequenced on a NextSeq 500/550 Flowcell, SR for 1x 75 cycles plus 7  
215 cycles for the index read.

216

217

## 218 **Bioinformatic analysis**

219 **sRNA sequencing analysis** Raw reads were first processed to remove adapters with  
220 v1.9 cutadapt (<https://cutadapt.readthedocs.io/en/stable/>) (seqtk trimfq -L 50 | cutadapt -a  
221 TGAATTCTCGGGTGCCAAGG -O 5 -m 26 -M 48), followed by removal of reads containing  
222 low quality calls with the FASTX-Toolkit v0.0.14 (fastq\_quality\_filter -q 20 -p 100 -Q 33). The  
223 information of the read sequence and the 5' and 3' random UMIs (NNNN-RNA sequence-  
224 NNNN) was then used to collapse reads with identical sequences, including that of the UMIs  
225 using a command-line script. UMIs were then removed (seqtk trimfq -b 4 -e 4), reads shorter  
226 than 15 nucleotides were removed (seqtk seq -L 15) before mapped against the *C. elegans*  
227 genome (WBcel235, ensembl) with bowtie v0.12.8 <sup>19</sup> (-q -sam -phred33-quals -tryhard -  
228 best -strata -v 0 -M 1). Coverage tracks were generated with Bedtools 2.25.0 <sup>20</sup>  
229 (genomeCoverageBed -bg -split -scale) to summarize genomic read coverage, and bigwigs  
230 created with bedGraphToBigWig. Normalization was done to total mapped reads. For  
231 visualization, the alignments were merged with bamtools-2.3.0 merge <sup>21</sup>. For the RIP-seq  
232 experiments, merged alignments were further processed to create log<sub>2</sub>(IP/input) normalized  
233 tracks using DeepTools <sup>22</sup> (bigwigCompare -binSize 1 -ratio log2).

234 To identify RNA-bound to the complex in RIPseq, we used DESeq2 <sup>23</sup> with the formula  
235 '~replicate+condition' in which each IP is being compared to the corresponding input  
236 control. Replicates are paired as they are generated from the same biological sample. All the  
237 samples in the dataset were included in construction of the DESeq2 object, in order to  
238 estimate the dispersion more robustly.

239 The number of reads mapping to different RNA classes was estimated with a combination of  
240 a custom Python script to select reads by size and nucleotide bias, available at  
241 [https://github.com/adomingues/filterReads/blob/master/filterReads/filterSmallRNAclasses.](https://github.com/adomingues/filterReads/blob/master/filterReads/filterSmallRNAclasses.py)  
242 [py](https://github.com/adomingues/filterReads/blob/master/filterReads/filterSmallRNAclasses.py), and bedtools intersect to match reads with annotated features. 21U RNAs were defined  
243 as reads with 18-40 bases mapping sense to an annotated 21U RNA *locus* (intersectBed -s -f  
244 0.85). 22G RNAs are all reads 20-23 bases long mapping antisense to protein coding genes,  
245 pseudogenes, lincRNA and transposons. 26G RNAs are 26 nucleotide long reads mapping  
246 antisense to protein coding genes, pseudogenes and lincRNA. For 22G and 26G RNAs a  
247 minimum overlap of 1 base was required (intersectBed default). miRNAs were defined as  
248 reads mapping sense to annotated miRNAs (intersectBed -s -f 1.0). The definition of 21U  
249 RNAs in particular was kept loose to allow for the identification of 21Us which are not fully  
250 mature. Gene locations were extracted from a custom gtf (genes + transposons) using the  
251 biotype information.

252 Metagene profiles were created with DeepTools. Read coverage was summarized with  
253 computeMatrix scale-regions --metagene --missingDataAsZero -b 50 -a 50 --  
254 regionBodyLength 98 --binSize 1 --averageTypeBins mean. As SL genes are multicopy genes,  
255 the setting --averageTypeBins was set to "sum". Using the "mean" of SL sequences did not  
256 alter the profile obtained (data no shown). The final metagene figure was created with  
257 plotProfile --plotType lines --perGroup.

258

259

260 **Supplemental figure 1 - PID-1 interacts with a restricted set of proteins**

- 261 **A)** Biological replicate of interaction data as described in Figure 1A.
- 262 **B)** mCherry pull-down of wild type (WT), *pid-1(xf14)* mutant and PID-  
263 3::mCherry::Myc;*pid-3(tm2417)* (PID-3::mCh) carrying worms. IPs were performed in  
264 non-gravid adult extracts. Membrane was probed for endogenous PID-1. Background  
265 recognition by the  $\checkmark$ PID-1 antibody is used as loading control.
- 266 **C)** Schematic representation of domain composition of PETISCO components used in  
267 the Y2H grid. In all cases proteins were fused to the C-terminal part of budding  
268 yeasts' GAL4 activation or binding domains.

269

270 **Supplemental Figure 2 – PID-1 interactor miniMos transgenes**

- 271 **A)** Schematic representation of miniMos transgene insertions for each of the PID-1  
272 interactors. *C. briggsae unc-119* is used as selection marker.
- 273 **B)** Expression pattern of 3xFLAG::mCherry::IFE-3 under endogenous promotor and  
274 3'UTR in germline and embryos. PGL-1::GFP is used as a P-granule marker. Images  
275 depict live worms under the wide field fluorescent microscope. Circle and arrow  
276 highlight PGL-1:IFE-3 co-localization. Scale Bar represents 10  $\mu$ m. Contrast of images  
277 has been enhanced.
- 278 **C)** Expression pattern of miniMos transgenes of PID-1 and its interactors under  
279 respective endogenous promotors and 3'UTR. Images depict live worms under the  
280 wide field fluorescent microscope. Scale Bar represents 20  $\mu$ m. Contrast of images  
281 has been enhanced.

282

283

284 **Supplemental Figure 3 – PETISCO is a stably interacting complex**

- 285 **a-e)** Volcano plots representing label-free proteomic quantification of quadruplicate anti-  
286 mCherry IPs from non-gravid adult extracts. In **a)** and **b)**, respectively, PID-  
287 3::mCherry::Myc;*pid-3(tm2417)*; or 3xFLAG::mCherry::IFE-3;*ife-3(xf101)*; were  
288 precipitated with or without RNase A/T1 treatment. Worms were grown in high  
289 density plates for these particular experiments. **c-e)** Independent IP-LFQP  
290 experiments of **c)** PID-3::mCherry::Myc;*pid-3(tm2417)*; **d)** PID-3::mCherry::Myc;*pid-*  
291 *1(xf14)*; and **e)** 3xFLAG::mCherry::IFE-3;*ife-3(xf101)*. In all cases the x-axis represents  
292 the median fold enrichment of individual proteins in control (WT) versus transgenic  
293 strain. y-axis indicates  $-\log_{10}(\text{p-value})$  of observed enrichments. Dashed lines  
294 represent thresholds at  $p=0.05$  and 2-fold enrichment. Blue data points represent  
295 values out of scale. Red and Green data points represent above and below threshold  
296 respectively.

297

298 **Supplemental Figure 4 – Yeast Two Hybrid interaction assays of PETISCO**

- 299 **b-e)** Yeast two-hybrid interaction assays of PETISCO subunits in low stringency (TRP<sup>-</sup>  
300 LEU<sup>-</sup>HIS<sup>-</sup>), high stringency (TRP<sup>-</sup>LEU<sup>-</sup>HIS<sup>-</sup>ADE<sup>-</sup>) or control (TRP<sup>-</sup>LEU<sup>-</sup>) plates as indicated.
- 301 **b)** Full length proteins **c)** TOFU-6 and individual domains tested for interaction with

302 full length IFE-3 **d)** Interactions between PID-3 and TOFU-6 **e)** Interactions with ERH-  
303 1.

304

305 **Supplemental Figure 5 – PETISCO mutant small RNA sequencing and gene structure.**

306 **A)** Schematic representation of individual gene structures of PETISCO components.  
307 Alleles are indicated within these schemes.

308 **b-d)** Global levels of **b)** type II 21U RNAs **c)** 26G RNAs and **d)** 22G RNAs in wild type  
309 (N2), *ife-3(xf102)*, *pid-3(tm2417)* and *erh-2(xf168)* worms. For the latter two  
310 heterozygous populations were used as a control. Values are in reads per million  
311 (RPM). Individual data points of three independent replicates are shown and  
312 horizontal bar represents the total mean. Significance was tested with Student's t-  
313 test and p-values are indicated in the graph.

314

315 **Supplemental Figure 6 – Masculinization of the germline in *pid-1(xf35)* mutant animals**

316 Fluorescent microscopy of the germline of 21U sensor GFP of *pid-1(xf35)*; 21U sensor  
317 worms. *pid-1(xf35)* hermaphrodites display a low frequency (<1%) Mog phenotype  
318 (second row). In the bottom row a male germline from the same strain is presented  
319 and in the top row a hermaphrodite germline of a *pid-1* knock-down. Scale Bars  
320 represent 20  $\mu$ m. Contrast of images has been enhanced.

321

322 **Supplemental Figure 7 – TOST-1 and PID-1 alignment and effects on small RNA populations**

323 **A)** Protein alignment of nematode PID-1 and TOST-1 orthologues. *C. elegans*  
324 orthologues are underlined in blue. Conserved motif is shaded in pink.

325 **B)** Temperature shift assays of the temperature sensitive allele *tost-1(xf196)*. L4 larvae  
326 were grown overnight (O/N) at 15°C or 25°C and shifted to 25°C or 15°C the next  
327 morning already as adults. O/N egg lay was shifted to corresponding temperature in  
328 parallel. Each individual was changed into a new plate every 2h and progeny counted  
329 at egg stage and L2 larvae. Each point represents the progeny of an individual worm.

330 **C)** Global levels of type II 21U RNAs, 26G RNAs and 22G RNAs in wild type (N2), *pid-*  
331 *1(xf35)* and *tost-1(xf194)* gravid adult worms. Values are in reads per million (RPM).  
332 Each dot represents a replicate of three and horizontal bar represents the total  
333 mean. Significance tested with Student's t-test and p-values are indicated in the  
334 graph.

335

336

337 **Supplemental Figure 8 – PETISCO and snRNAs**

338 **a)** Read coverage of SL1 RNA and 5S rRNA genes in wild type (N2), *pid-1(xf35)* and *tost-*  
339 *1(xf194)* gravid adult worms and *pid-3(tm2417)*, *erh-2(xf168)* and *ife-3(xf102)* non-  
340 gravid adults. Line represents the average of three replicates. Colors under SL1 RNA  
341 correspond to scaled colors represented in Figure 6A.

342 **b)** Global levels of SL2 RNAs in wild type (N2), *pid-1(xf35)* and *tost-1(xf194)* gravid adult  
343 worms and *pid-3(tm2417)*, *erh-2(xf168)* and *ife-3(xf102)* non-gravid adults. Values



344 are in reads per million (RPM). Individual data points of three independent replicates  
345 are shown and horizontal bar represents the total mean. Significance was tested with  
346 Student's t-test and p-values are indicated in the graph.

347 **c)** Fold enrichment of SL2 RNAs in Mock (N2), 3xFLAG::mCherry::lFE-3;*ife-3(xf101)*; and  
348 PID-3::mCherry::Myc;*pid-3(tm2417)* RIPs over paired input in non-gravid adult  
349 worms. Individual data points of four independent replicates are shown and  
350 horizontal bar represents the total mean. Significance was tested with Student's t-  
351 test and p-values are indicated in the graph.

352 **d)** Coverage profile, normalized to paired input, of SL2 in the indicated strains.

353 **e)** Violin plots showing the enrichments of 21U RNA genes and U snRNAs genes in Mock  
354 (N2), 3xFLAG::mCherry::lFE-3;*ife-3(xf101)*; and PID-3::mCherry::Myc;*pid-3(tm2417)*  
355 RIPs over paired input in non-gravid adult worms. Left panel: non-treated RNA  
356 samples; right panel: RppH treated samples. Significance was tested with a two-sided  
357 unpaired Mann-Whitney/Wilcoxon rank-sum test.

358

359

360 **References**

- 361 1. Brenner, S. The genetics of *Caenorhabditis elegans*. *Genetics* **77**, 71-94 (1974).
- 362 2. Schweinsberg, P.J. & Grant, B.D. *C. elegans* gene transformation by microparticle  
363 bombardment. *WormBook*, 1-10 (2013).
- 364 3. Friedland, A.E. et al. Heritable genome editing in *C. elegans* via a CRISPR-Cas9 system.  
365 *Nat Methods* **10**, 741-3 (2013).
- 366 4. Naito, Y., Hino, K., Bono, H. & Ui-Tei, K. CRISPRdirect: software for designing  
367 CRISPR/Cas guide RNA with reduced off-target sites. *Bioinformatics* **31**, 1120-3  
368 (2015).
- 369 5. Frokjaer-Jensen, C. et al. Random and targeted transgene insertion in *Caenorhabditis*  
370 *elegans* using a modified Mos1 transposon. *Nat Methods* **11**, 529-34 (2014).
- 371 6. Duerr, J.S. Antibody staining in *C. elegans* using "freeze-cracking". *J Vis Exp* (2013).
- 372 7. Timmons, L. & Fire, A. Specific interference by ingested dsRNA. *Nature* **395**, 854  
373 (1998).
- 374 8. Kamath, R.S. et al. Systematic functional analysis of the *Caenorhabditis elegans*  
375 genome using RNAi. *Nature* **421**, 231-7 (2003).
- 376 9. Schmittgen, T.D. & Livak, K.J. Analyzing real-time PCR data by the comparative C(T)  
377 method. *Nat Protoc* **3**, 1101-8 (2008).
- 378 10. Hoogewijs, D., Houthoofd, K., Matthijssens, F., Vandesompele, J. & Vanfleteren, J.R.  
379 Selection and validation of a set of reliable reference genes for quantitative sod gene  
380 expression analysis in *C. elegans*. *BMC Mol Biol* **9**, 9 (2008).
- 381 11. James, P., Halladay, J. & Craig, E.A. Genomic libraries and a host strain designed for  
382 highly efficient two-hybrid selection in yeast. *Genetics* **144**, 1425-36 (1996).
- 383 12. de Albuquerque, B.F. et al. PID-1 is a novel factor that operates during 21U-RNA  
384 biogenesis in *Caenorhabditis elegans*. *Genes Dev* **28**, 683-8 (2014).
- 385 13. Shevchenko, A., Tomas, H., Havlis, J., Olsen, J.V. & Mann, M. In-gel digestion for mass  
386 spectrometric characterization of proteins and proteomes. *Nat Protoc* **1**, 2856-60  
387 (2006).
- 388 14. Kappei, D. et al. HOTA1 is a mammalian direct telomere repeat-binding protein  
389 contributing to telomerase recruitment. *EMBO J* **32**, 1681-701 (2013).
- 390 15. Rappsilber, J., Mann, M. & Ishihama, Y. Protocol for micro-purification, enrichment,  
391 pre-fractionation and storage of peptides for proteomics using StageTips. *Nat Protoc*  
392 **2**, 1896-906 (2007).
- 393 16. Bluhm, A., Casas-Vila, N., Scheibe, M. & Butter, F. Reader interactome of epigenetic  
394 histone marks in birds. *Proteomics* **16**, 427-36 (2016).
- 395 17. Cox, J. & Mann, M. MaxQuant enables high peptide identification rates,  
396 individualized p.p.b.-range mass accuracies and proteome-wide protein  
397 quantification. *Nat Biotechnol* **26**, 1367-72 (2008).
- 398 18. Neri, F. et al. Intragenic DNA methylation prevents spurious transcription initiation.  
399 *Nature* **543**, 72-77 (2017).
- 400 19. Langmead, B., Trapnell, C., Pop, M. & Salzberg, S.L. Ultrafast and memory-efficient  
401 alignment of short DNA sequences to the human genome. *Genome Biol* **10**, R25  
402 (2009).
- 403 20. Quinlan, A.R. & Hall, I.M. BEDTools: a flexible suite of utilities for comparing genomic  
404 features. *Bioinformatics* **26**, 841-2 (2010).
- 405 21. Barnett, D.W., Garrison, E.K., Quinlan, A.R., Stromberg, M.P. & Marth, G.T. BamTools:  
406 a C++ API and toolkit for analyzing and managing BAM files. *Bioinformatics* **27**, 1691-2  
407 (2011).

- 408 22. Ramirez, F. et al. deepTools2: a next generation web server for deep-sequencing data  
409 analysis. *Nucleic Acids Res* **44**, W160-5 (2016).
- 410 23. Love, M.I., Huber, W. & Anders, S. Moderated estimation of fold change and  
411 dispersion for RNA-seq data with DESeq2. *Genome Biol* **15**, 550 (2014).

412

# Supplemental Figure 1

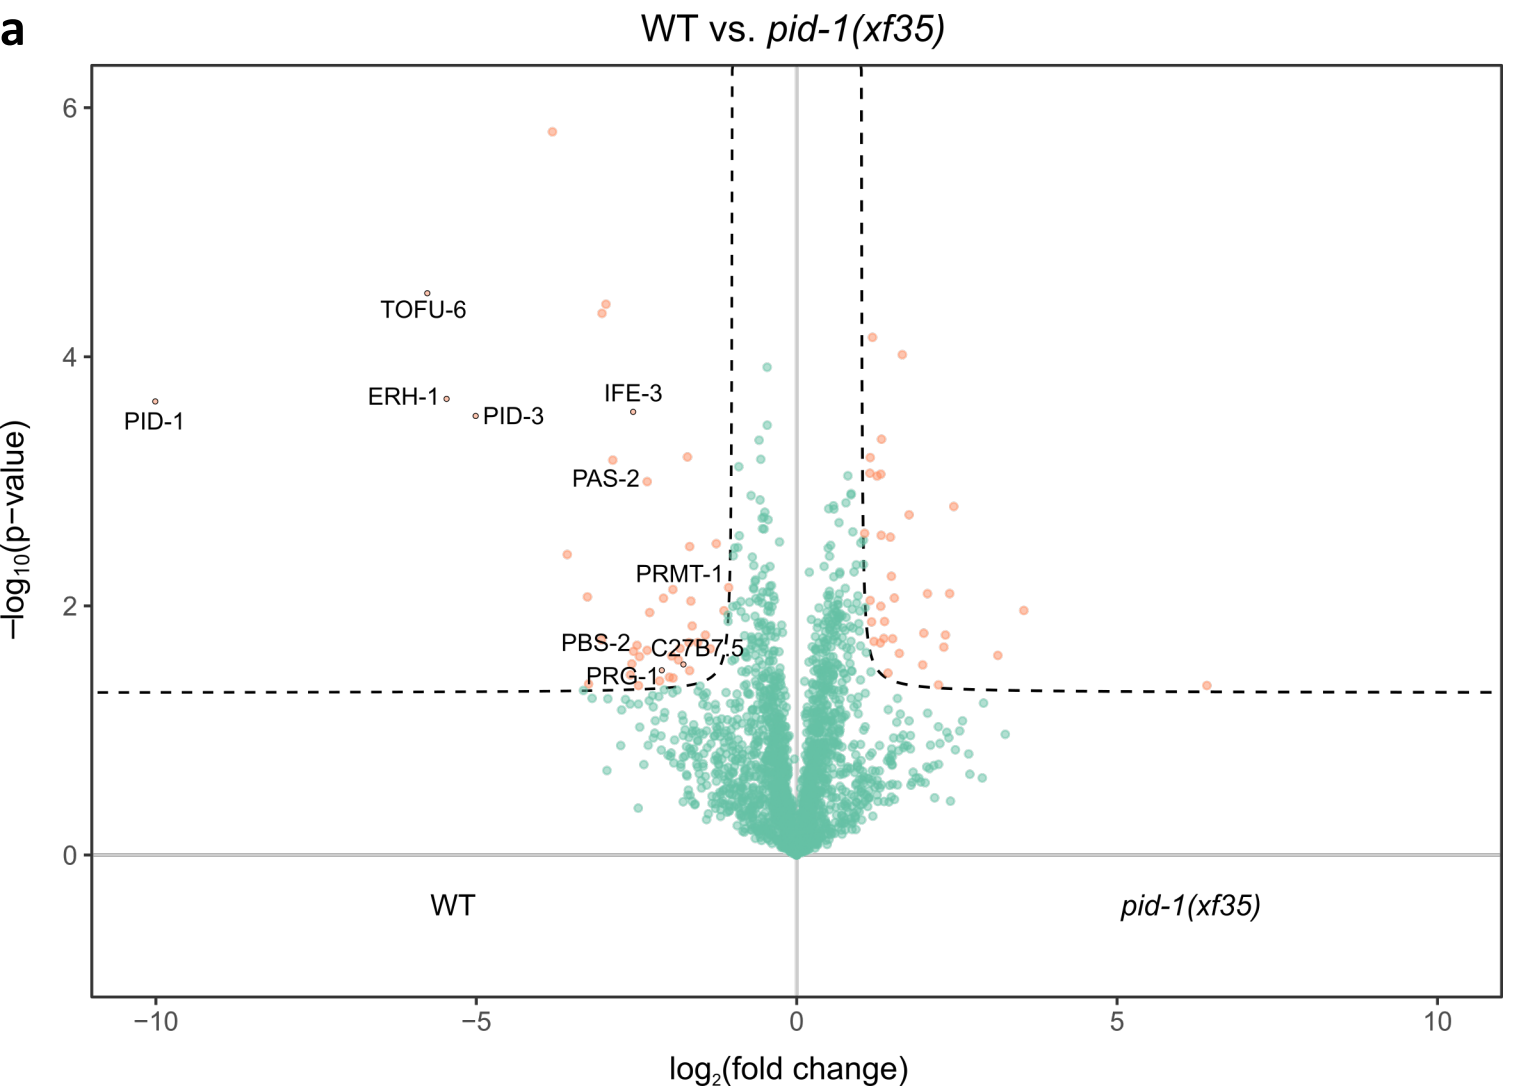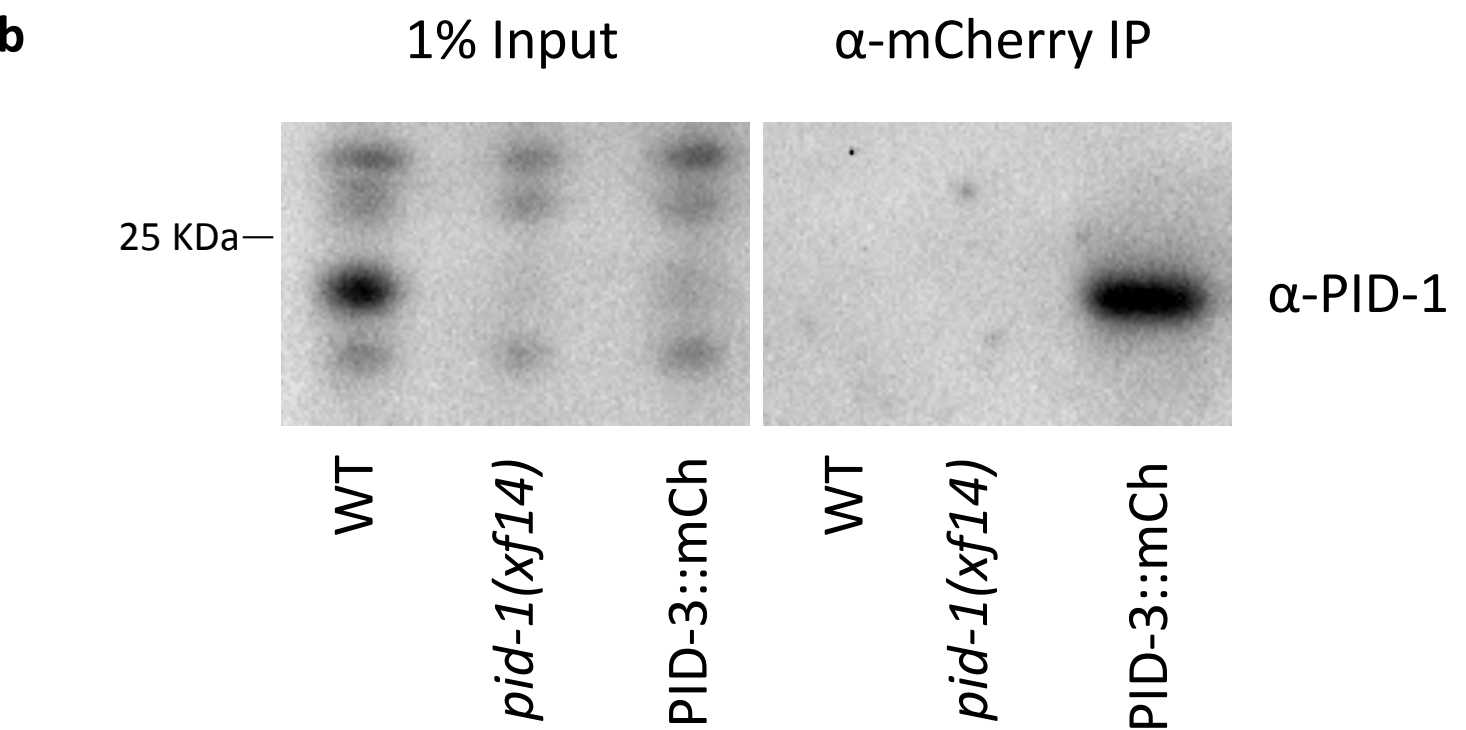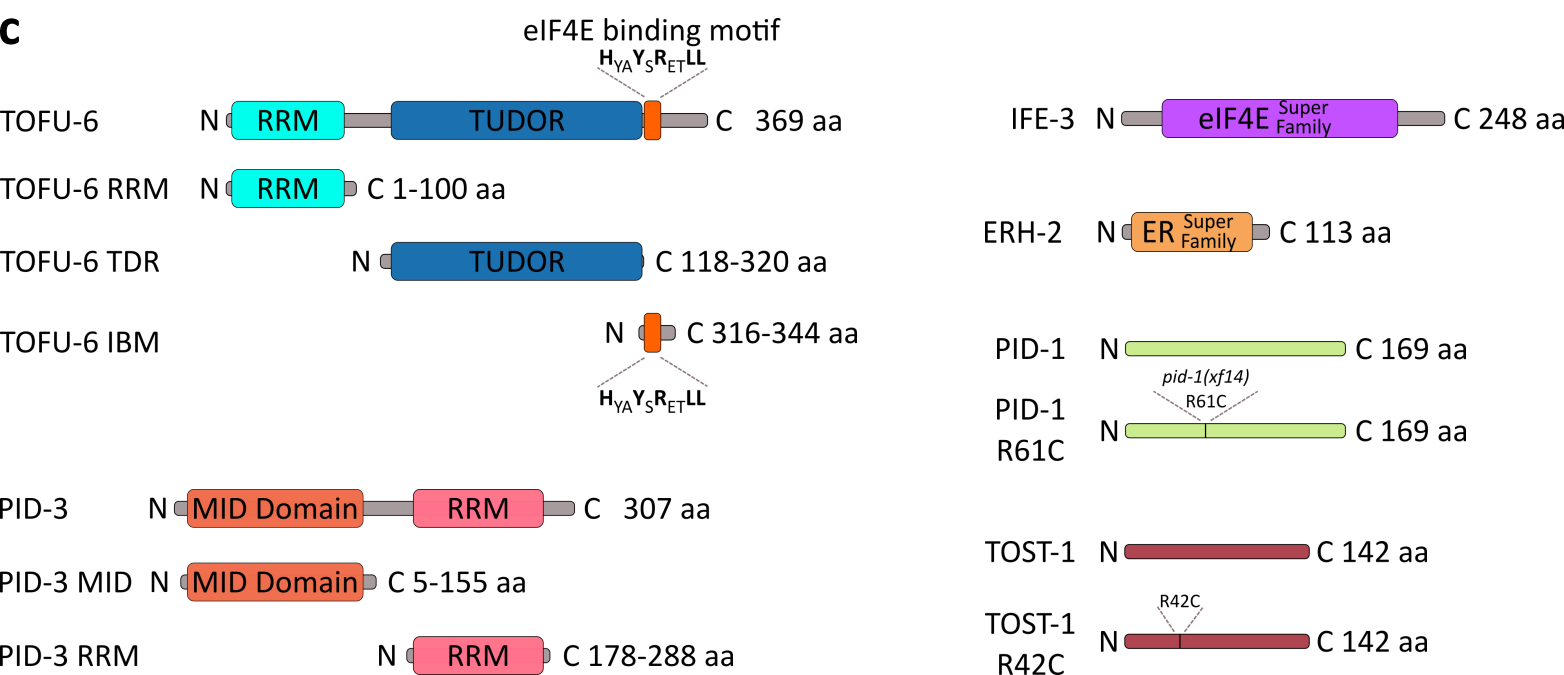



# Supplemental Figure 2

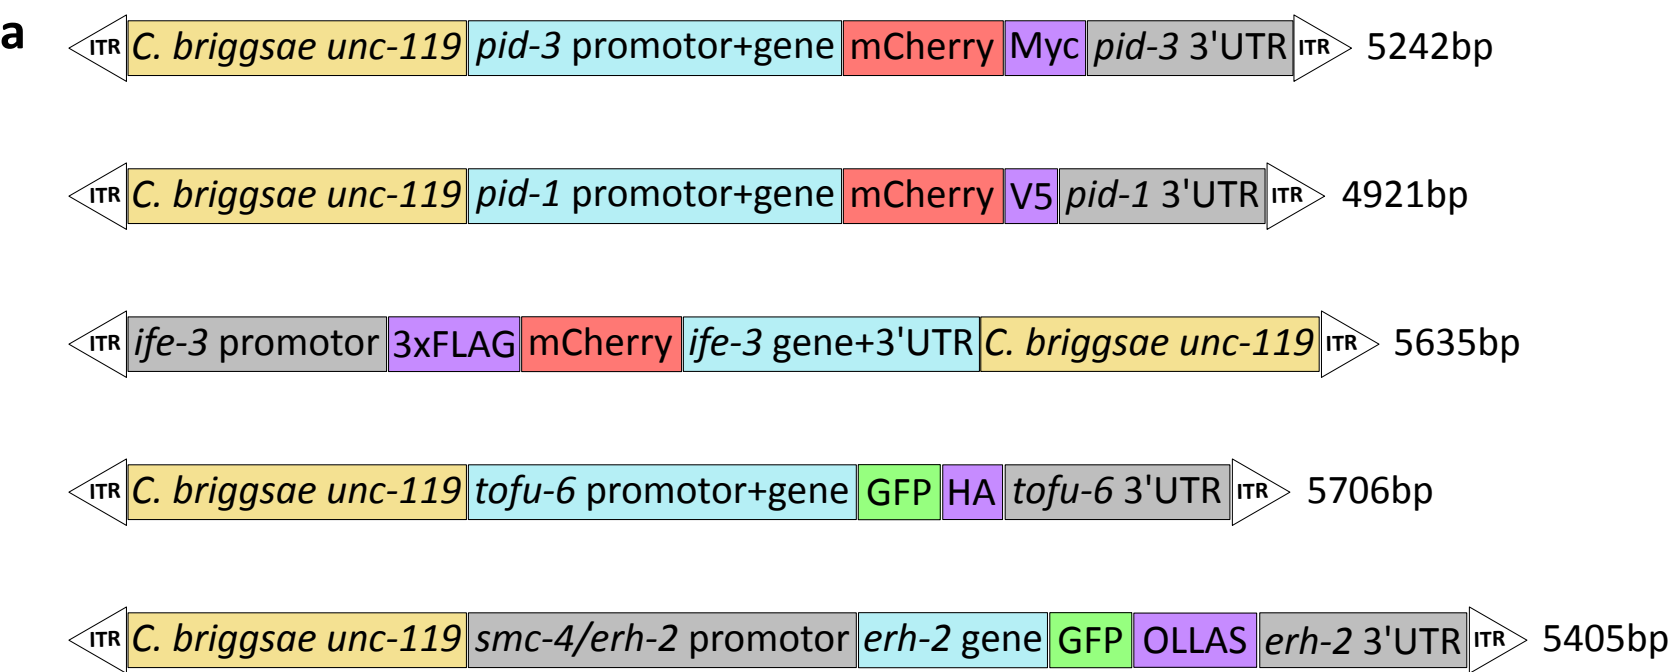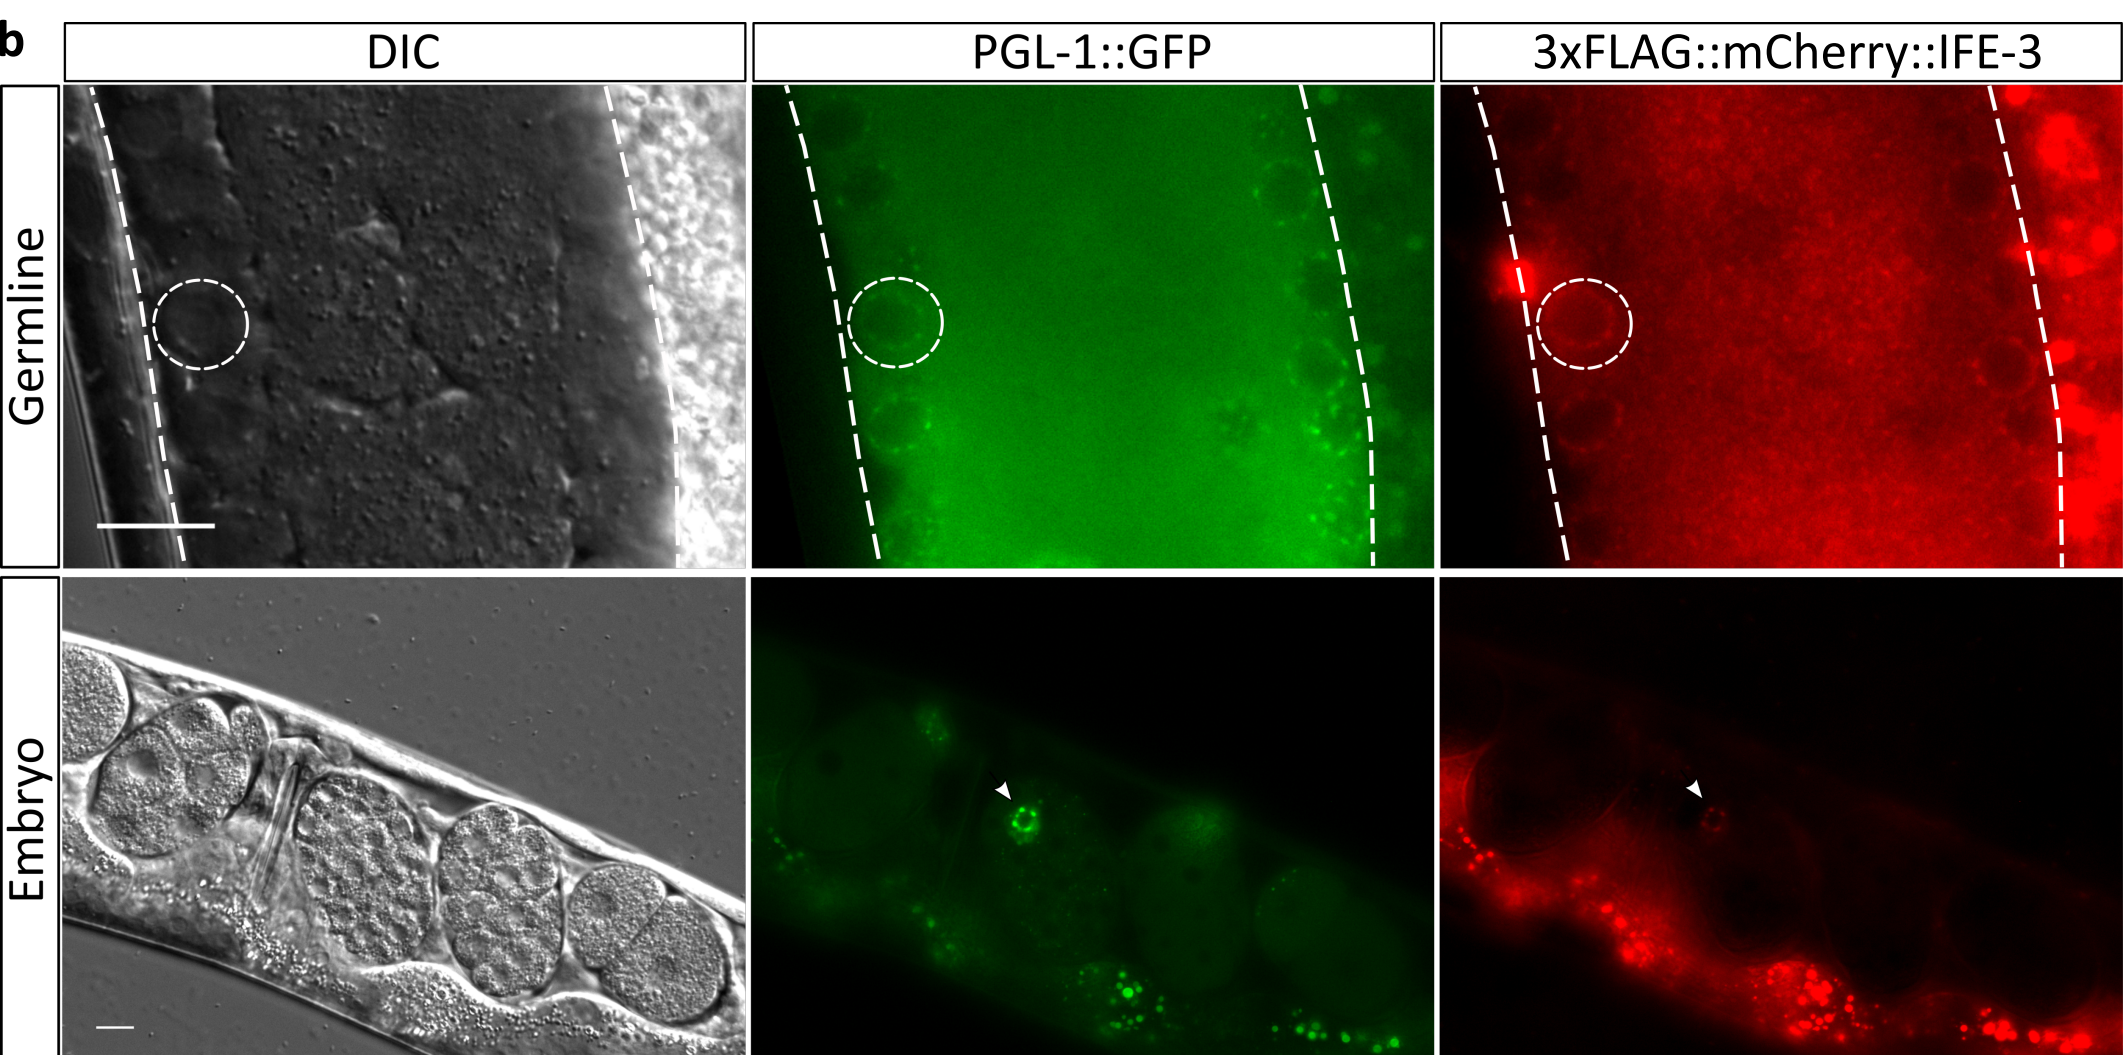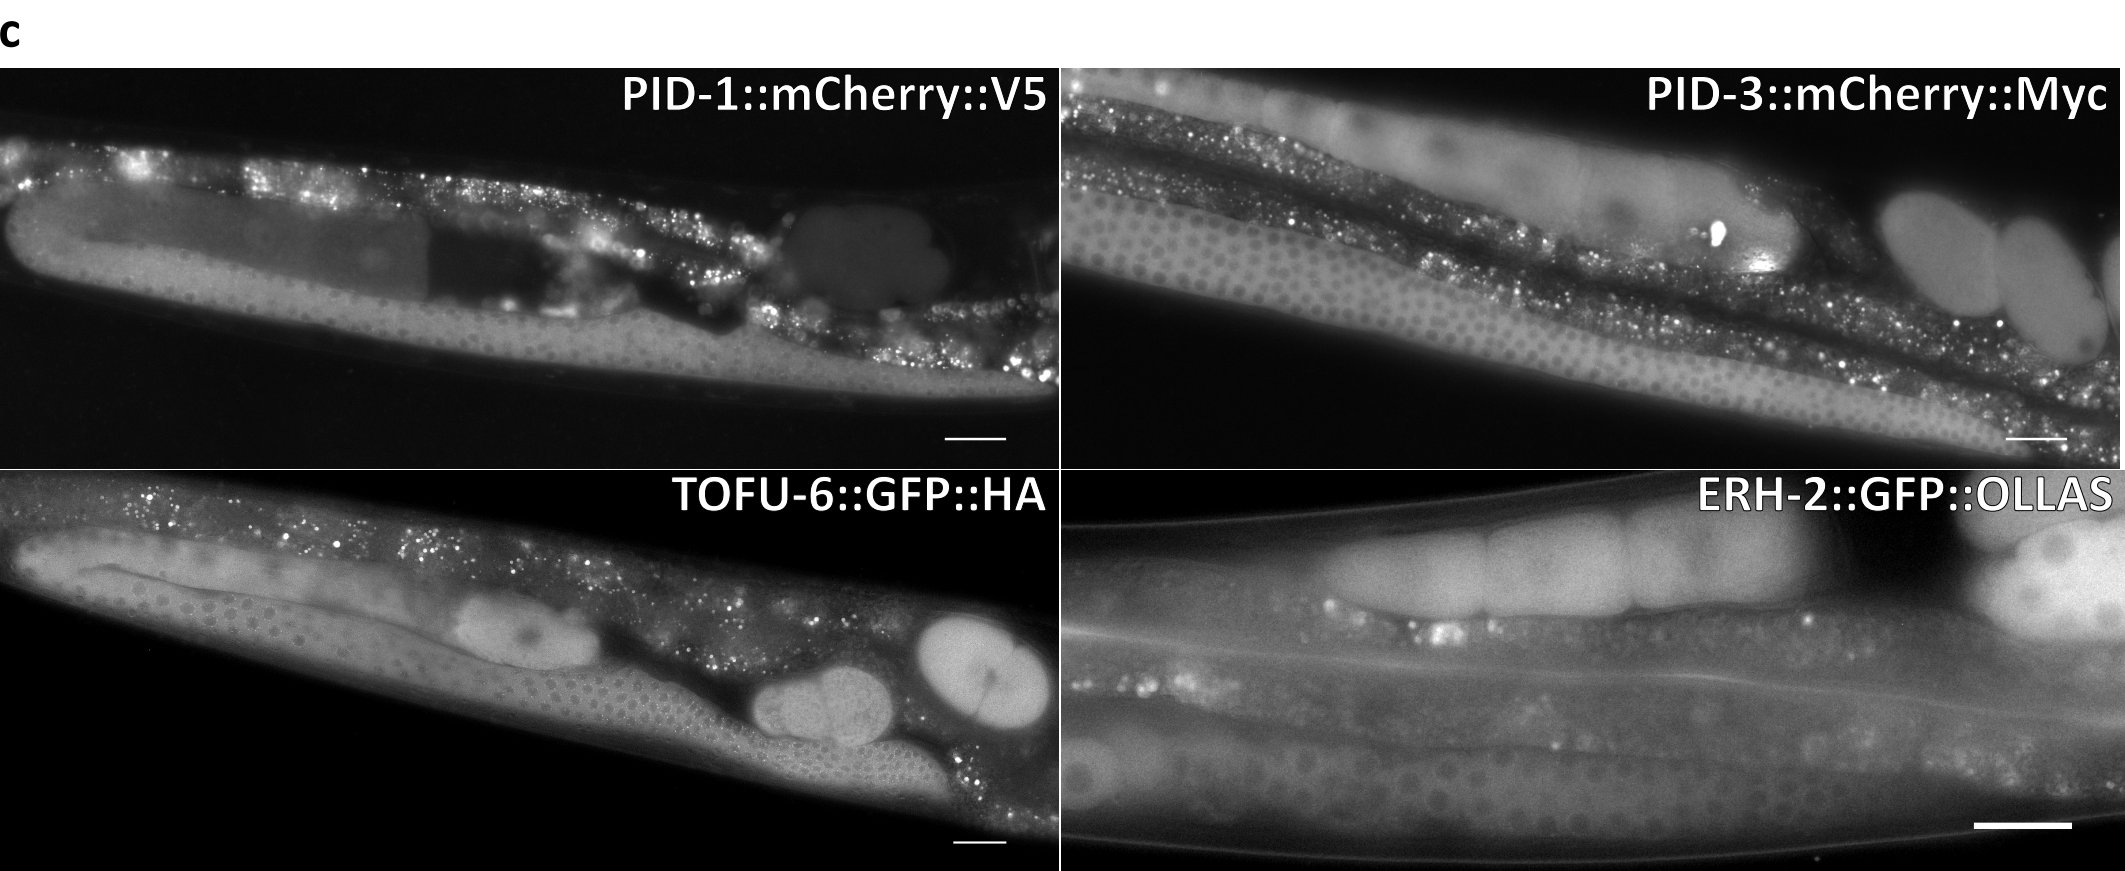

# Supplemental Figure 3

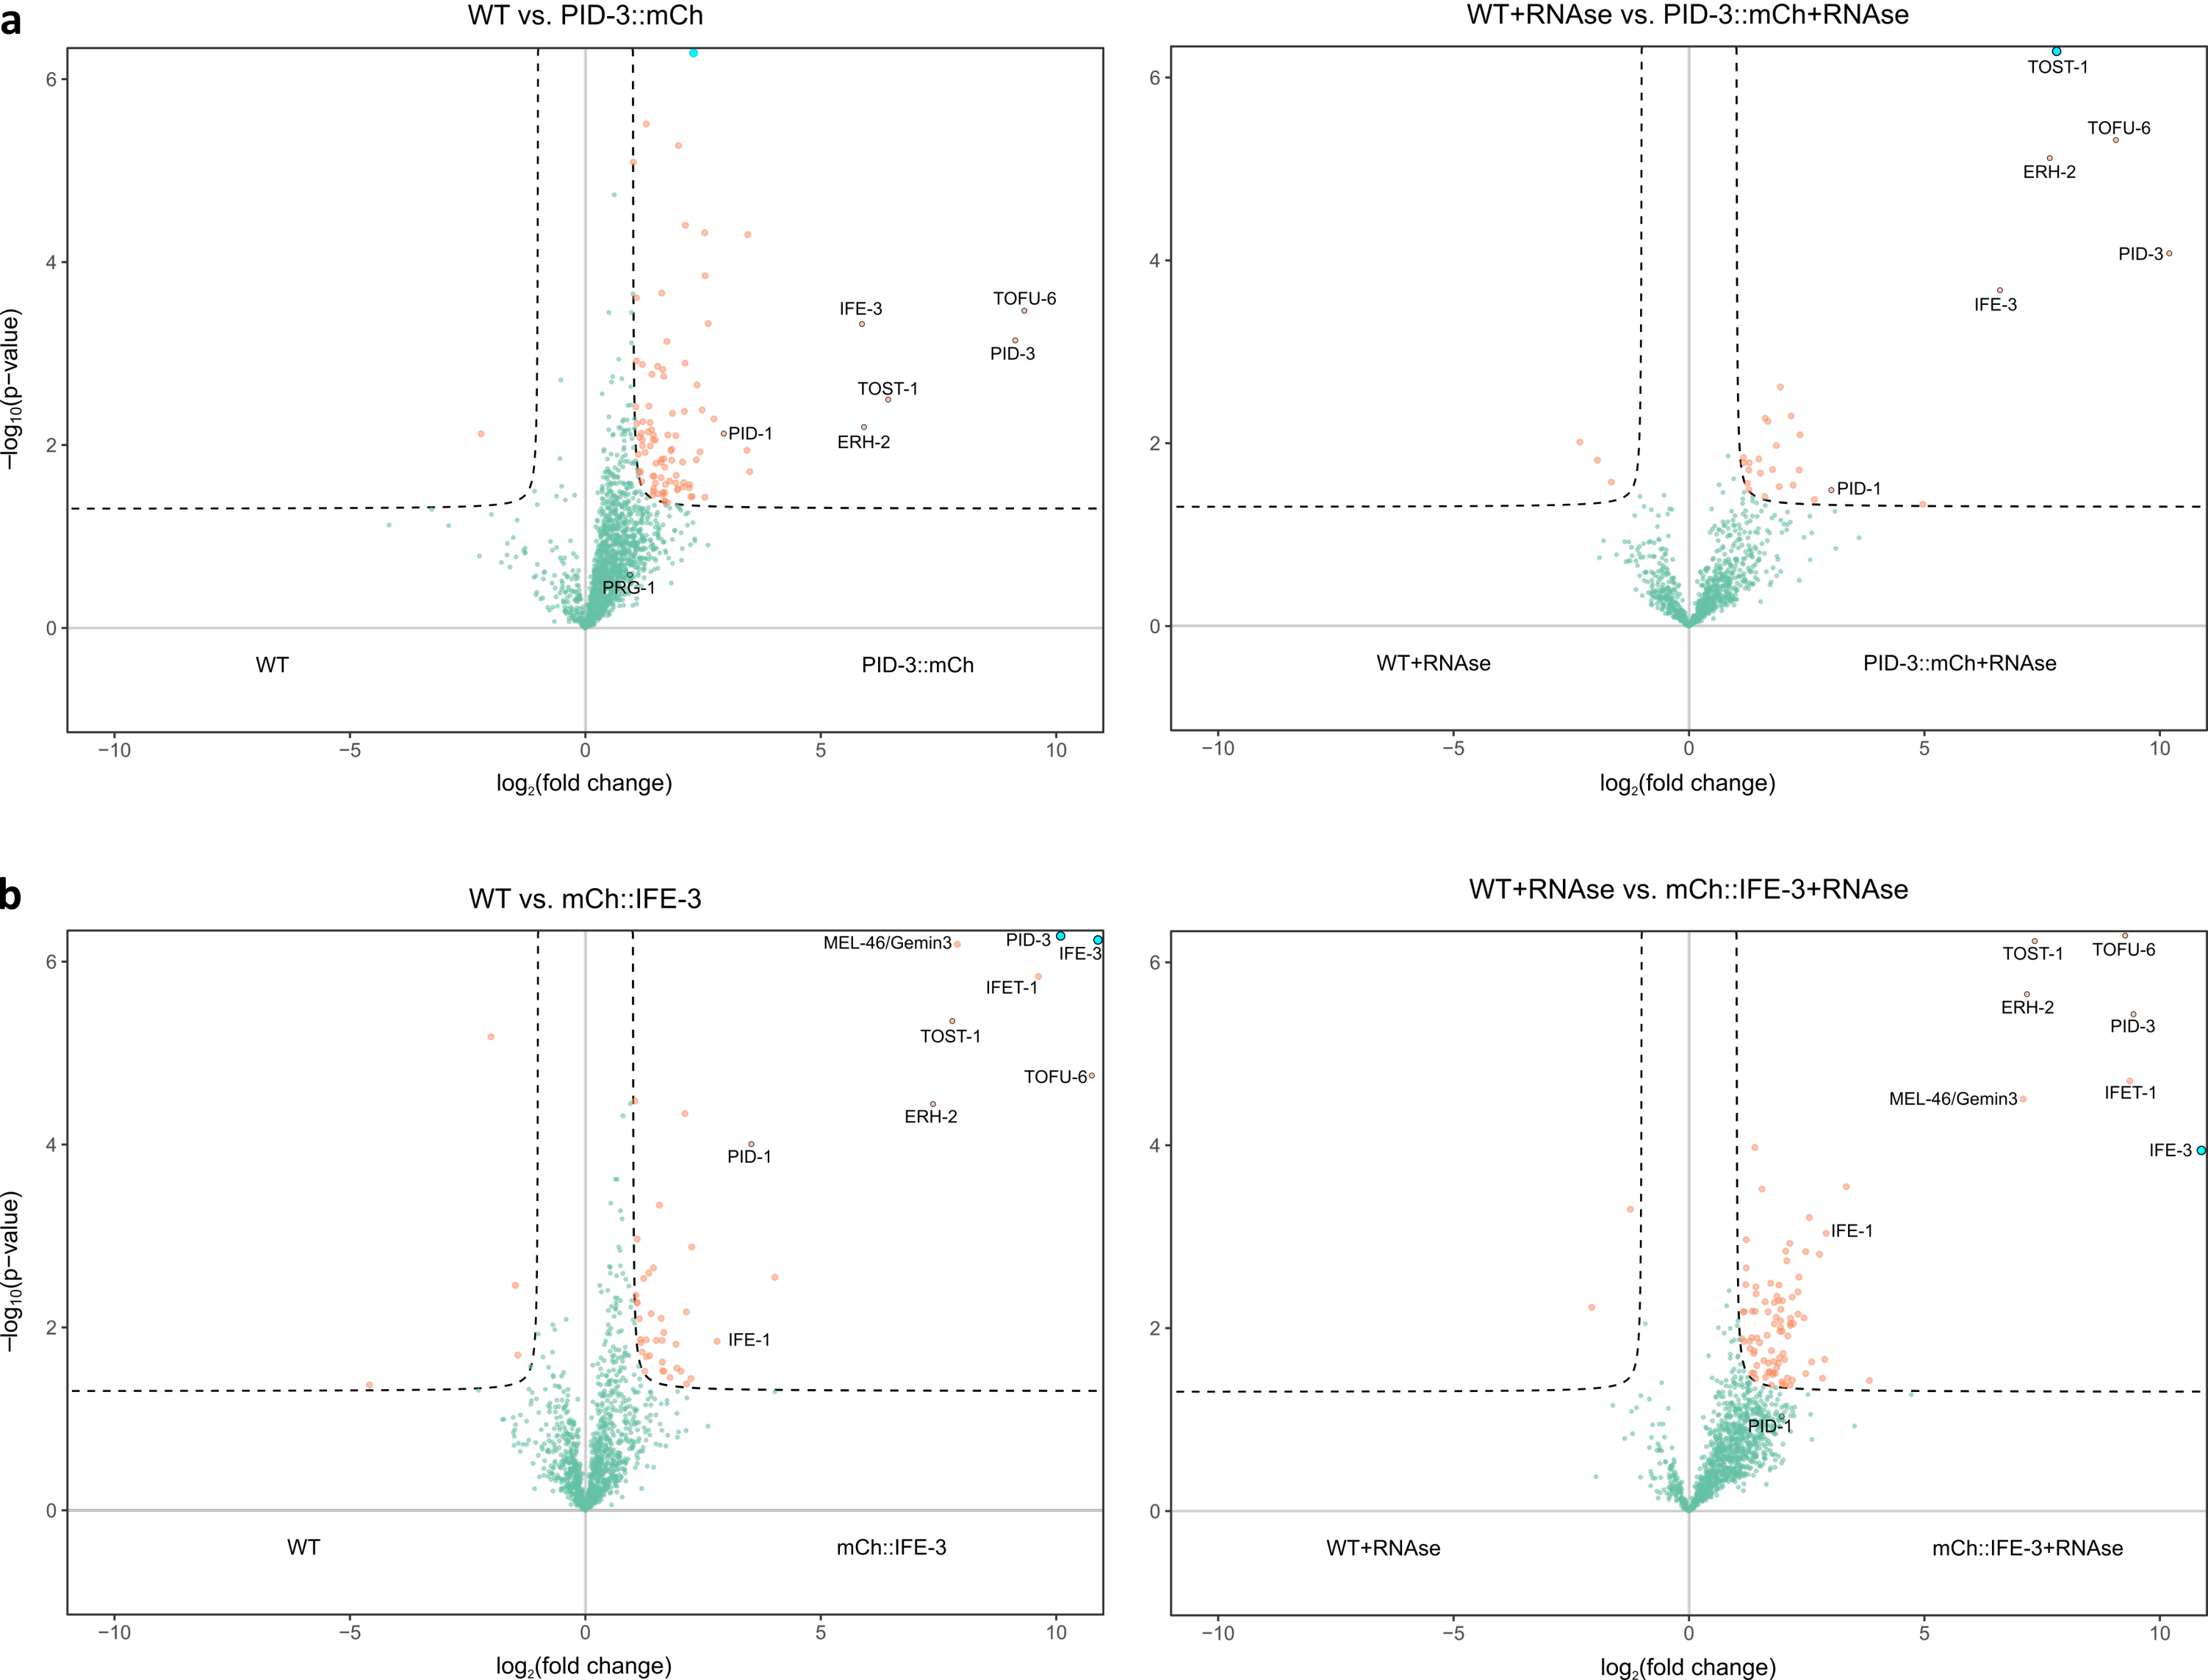



# Supplemental Figure 4

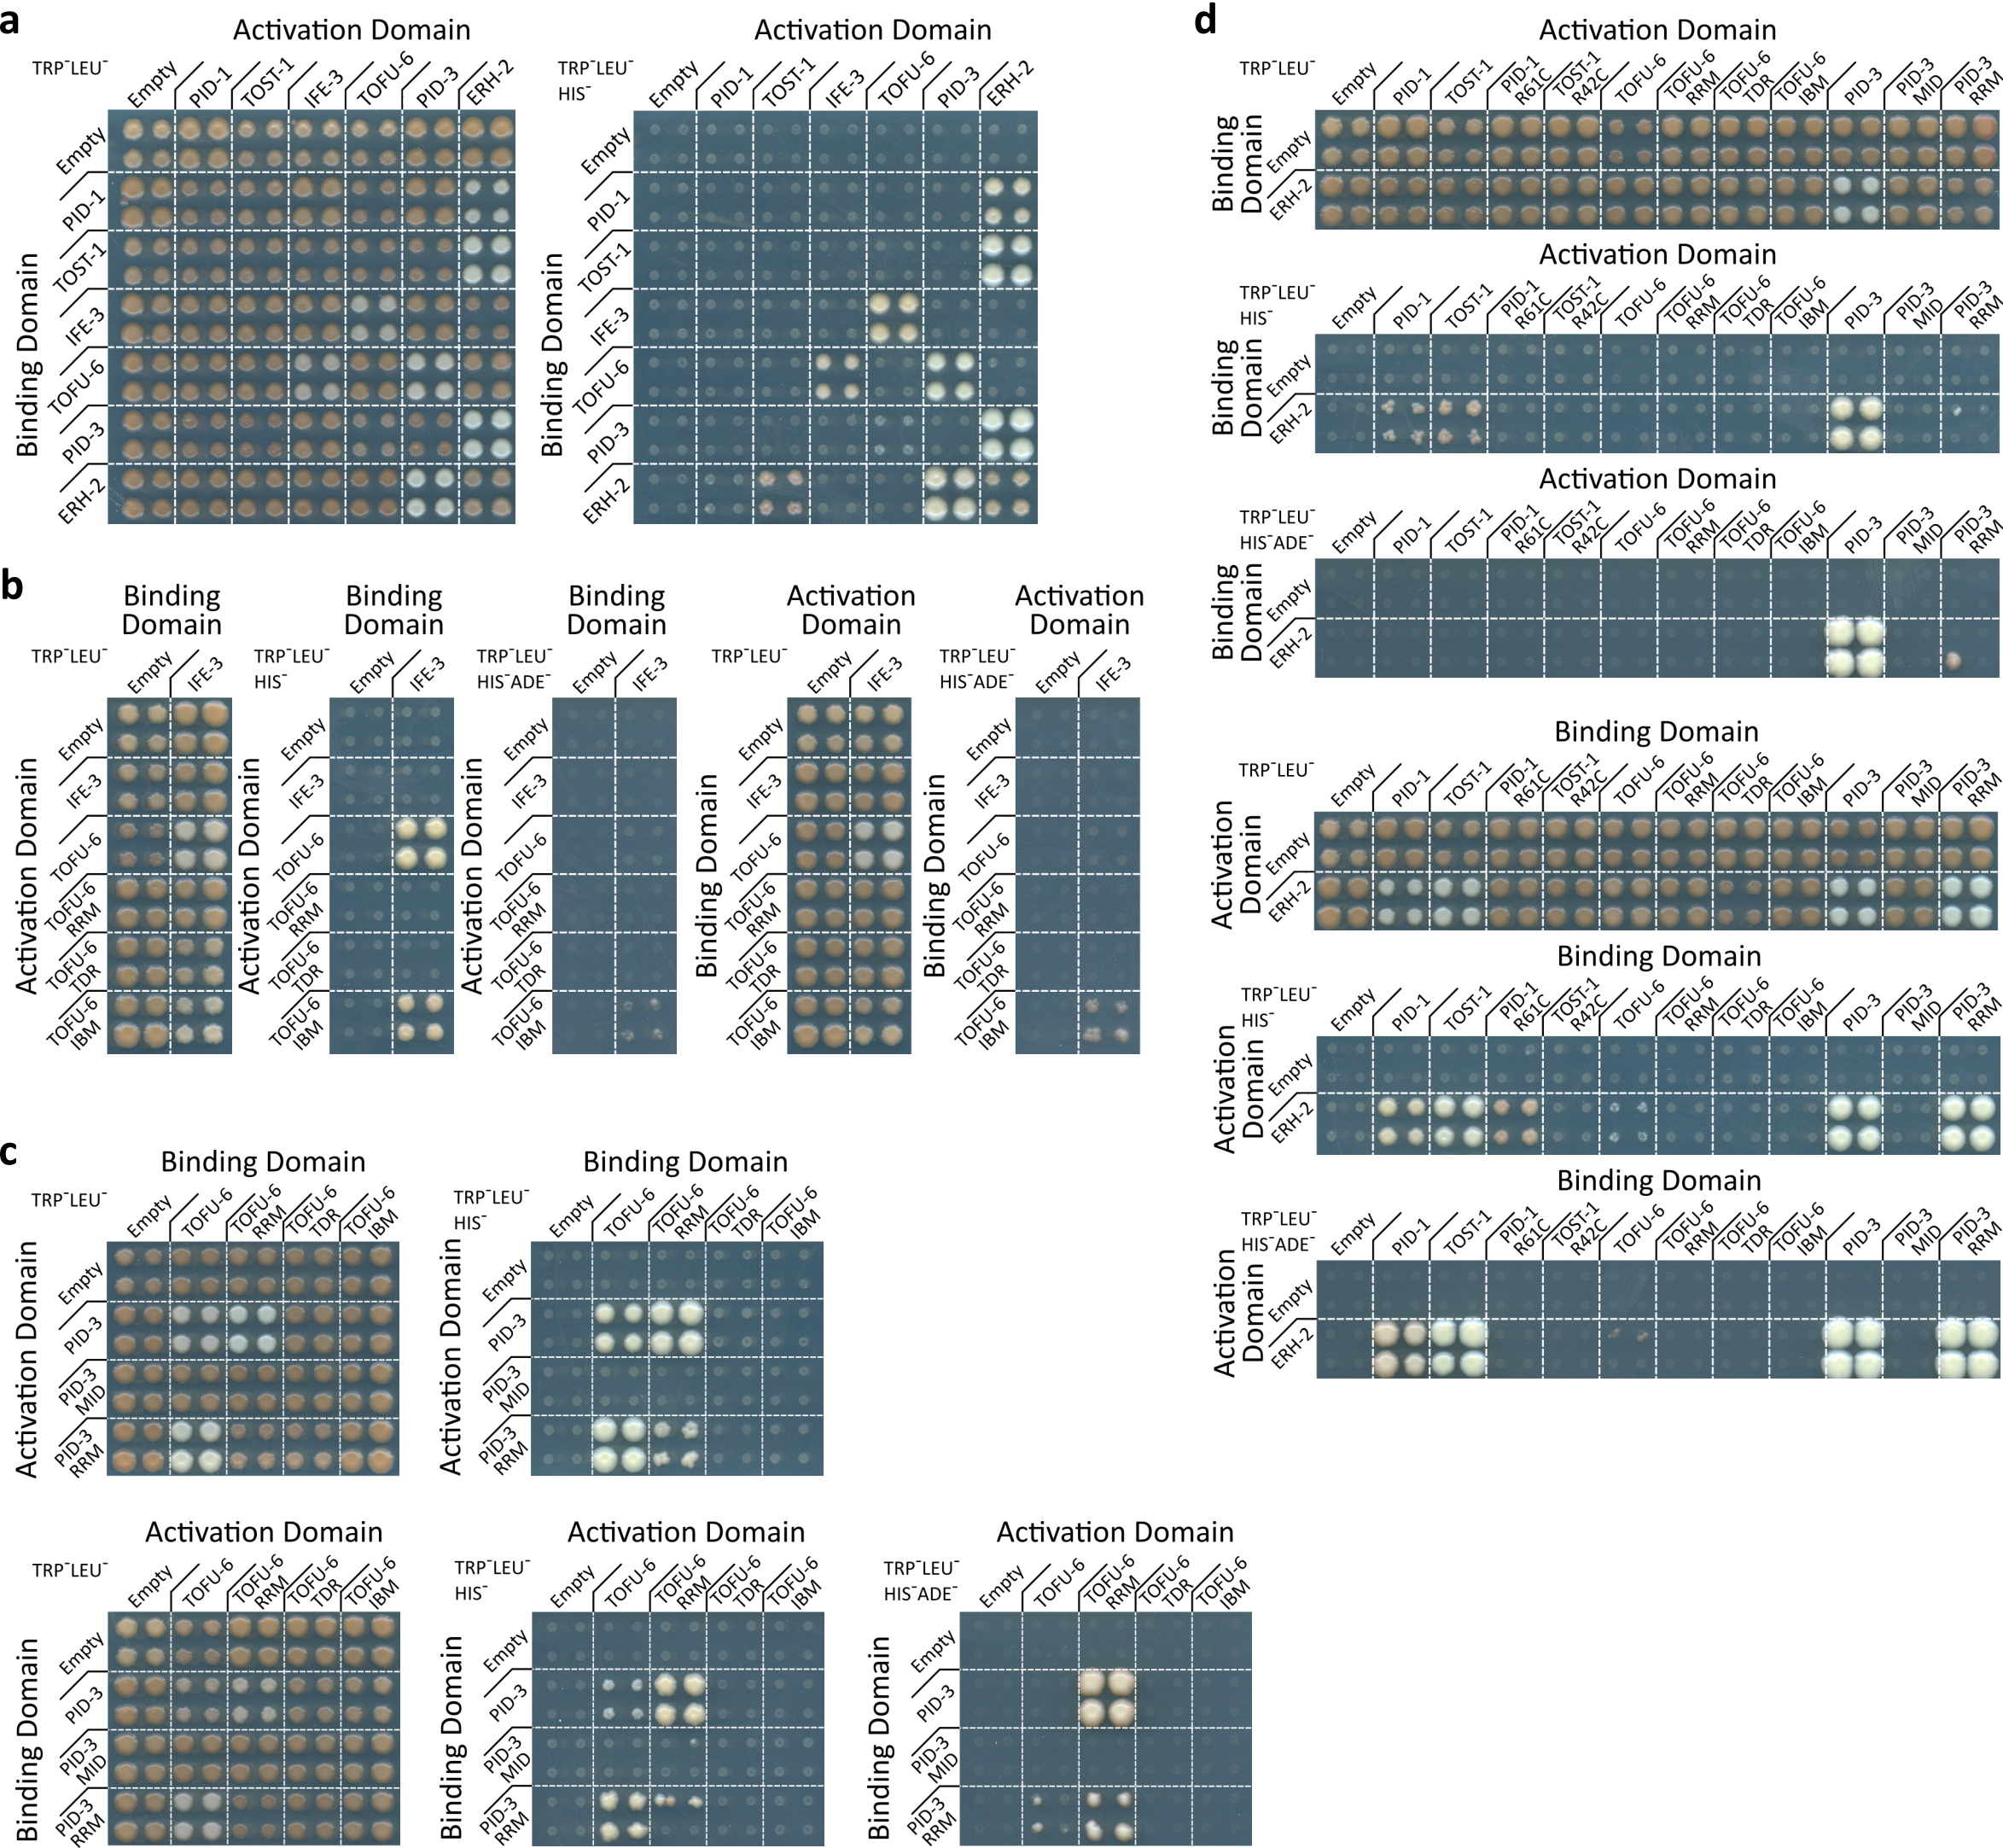



# Supplemental Figure 5

**a**

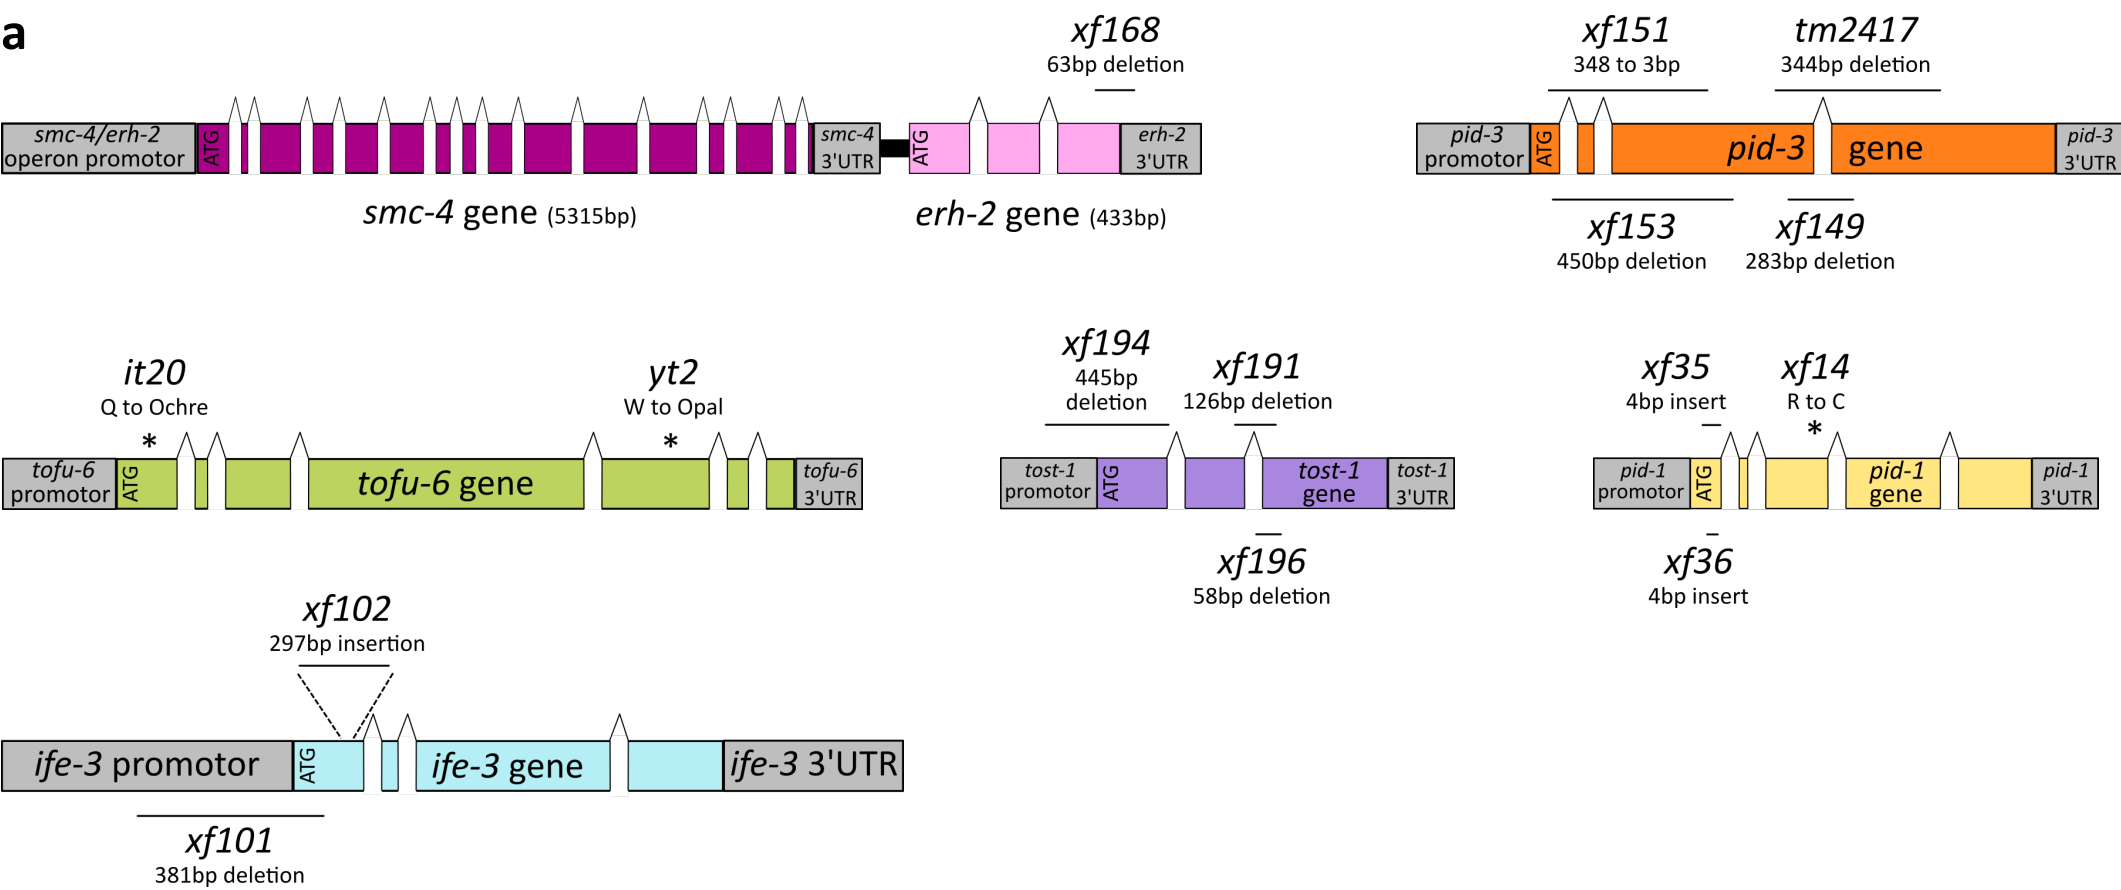

**b**

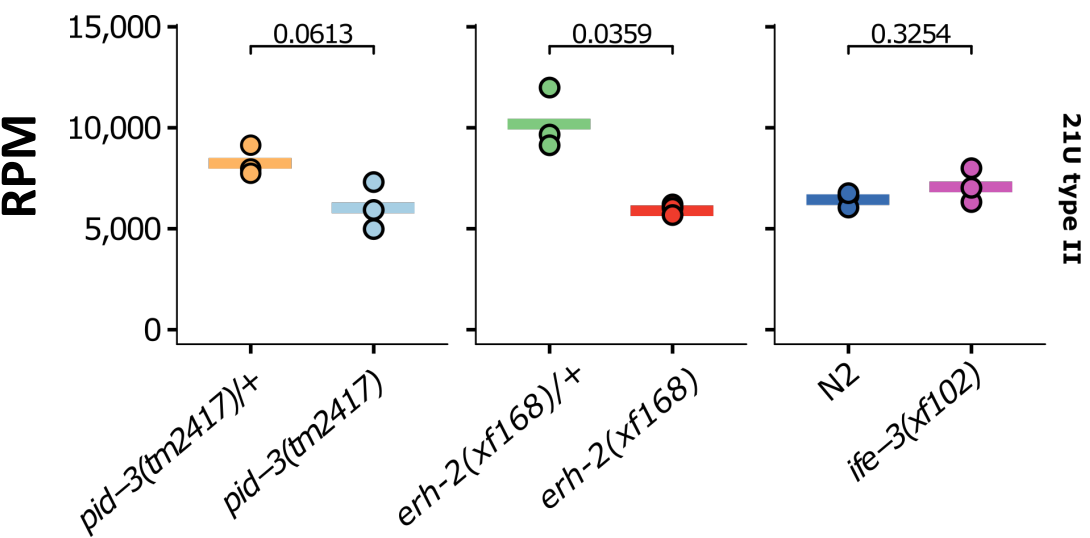

**c**

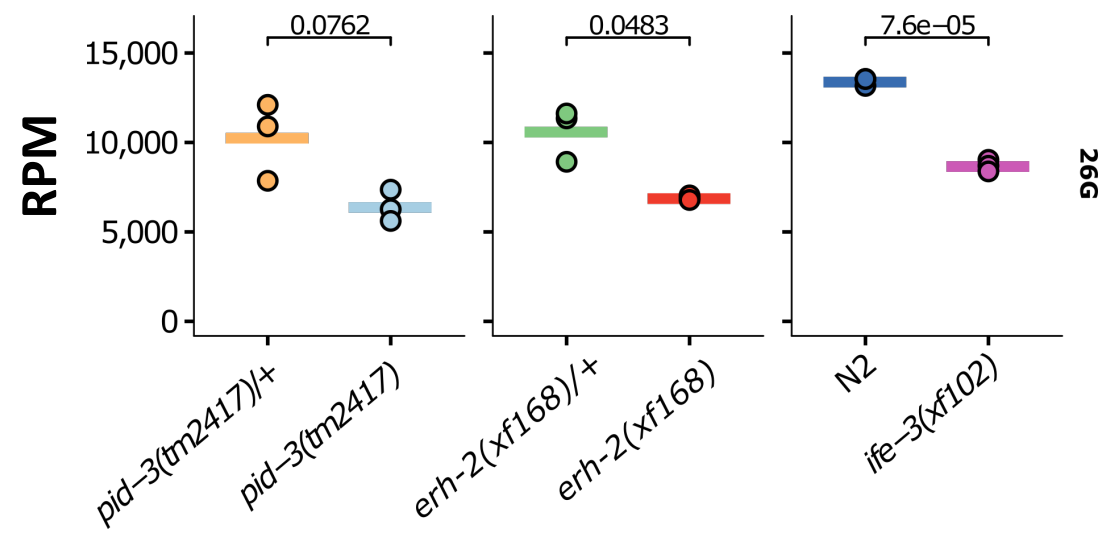

**d**

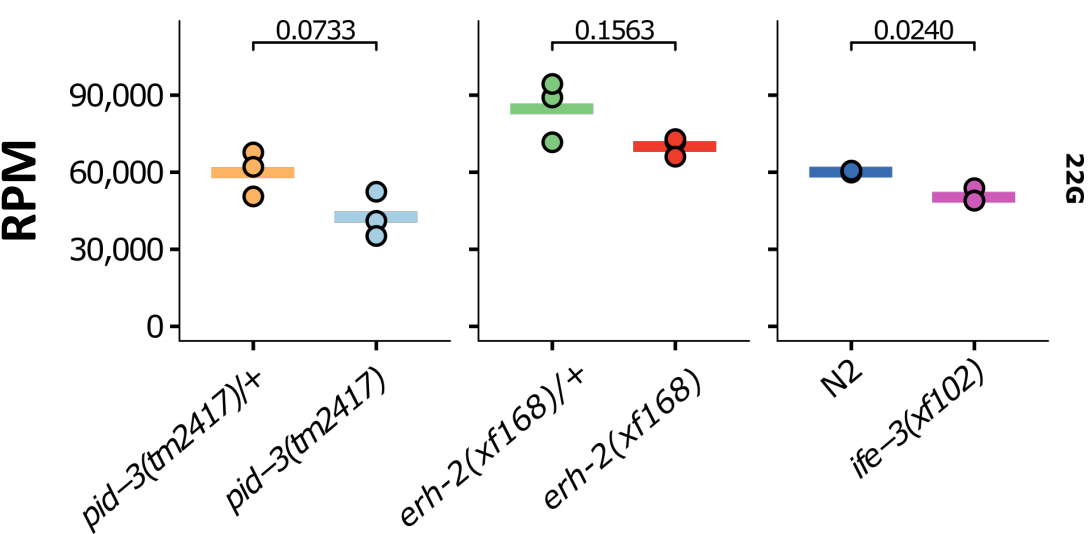



# Supplemental Figure 6

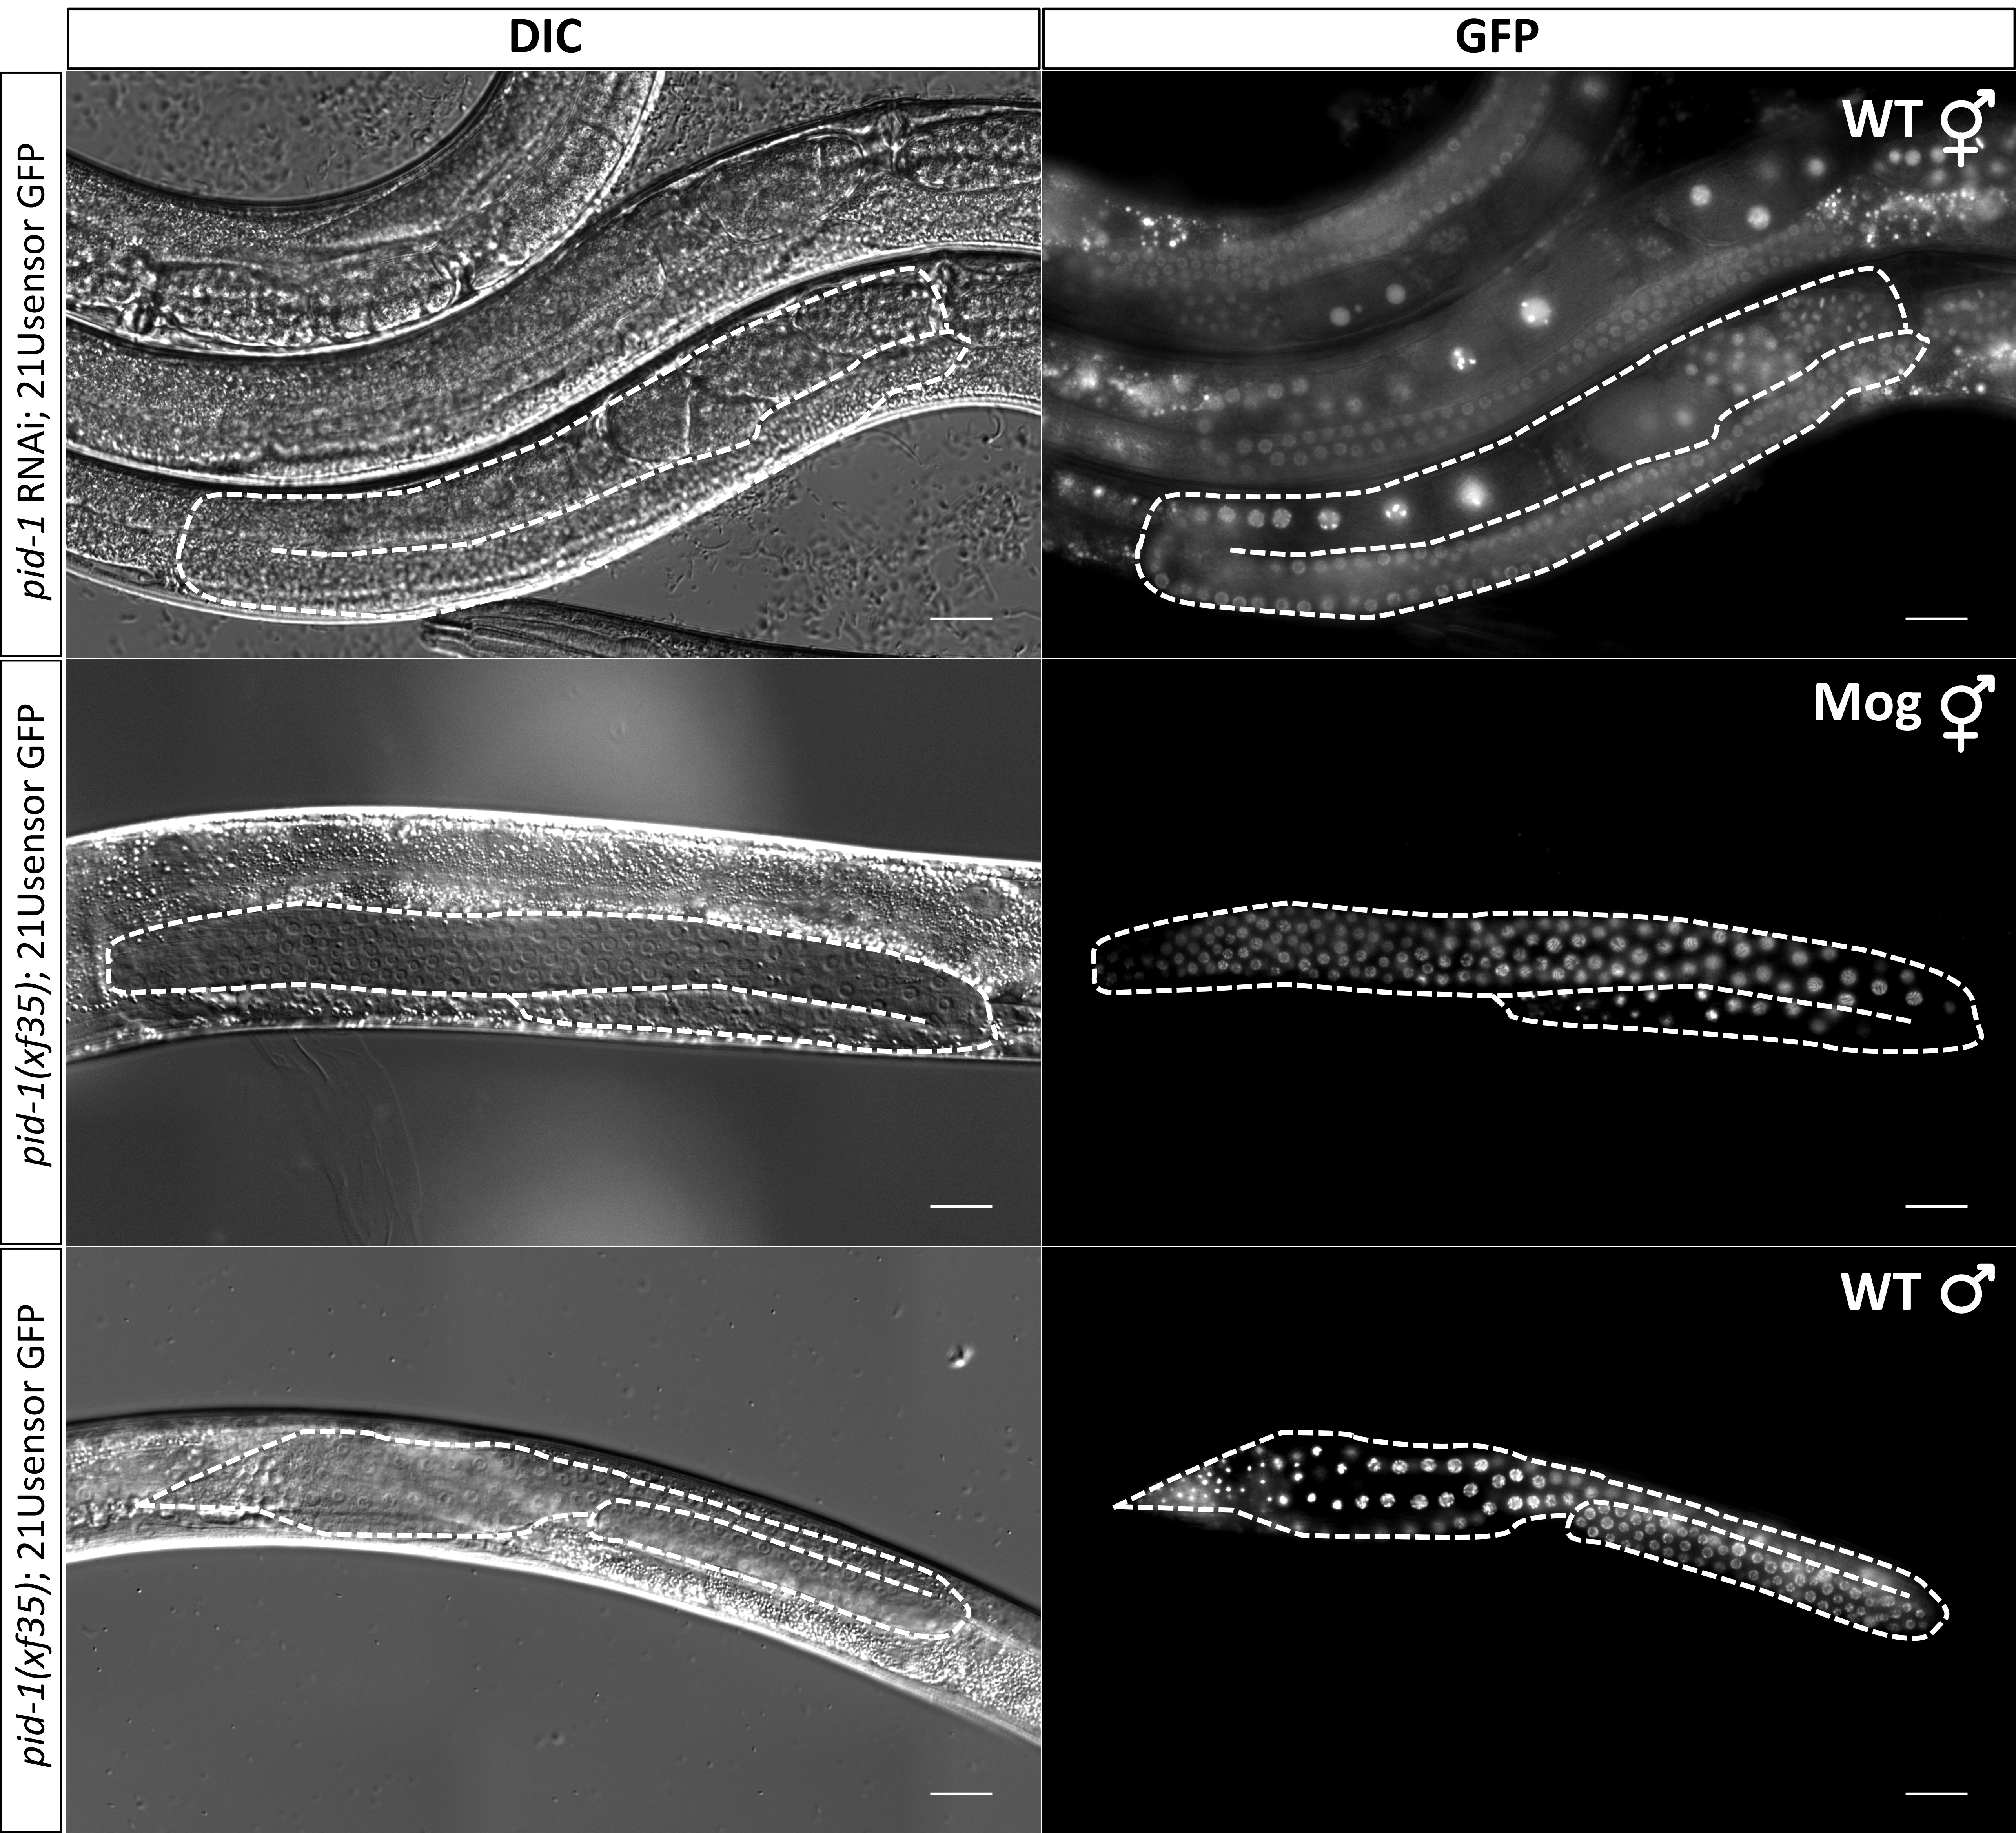



# Supplemental Figure 7

**a**

CLUSTAL multiple sequence alignment by MUSCLE (3.8)

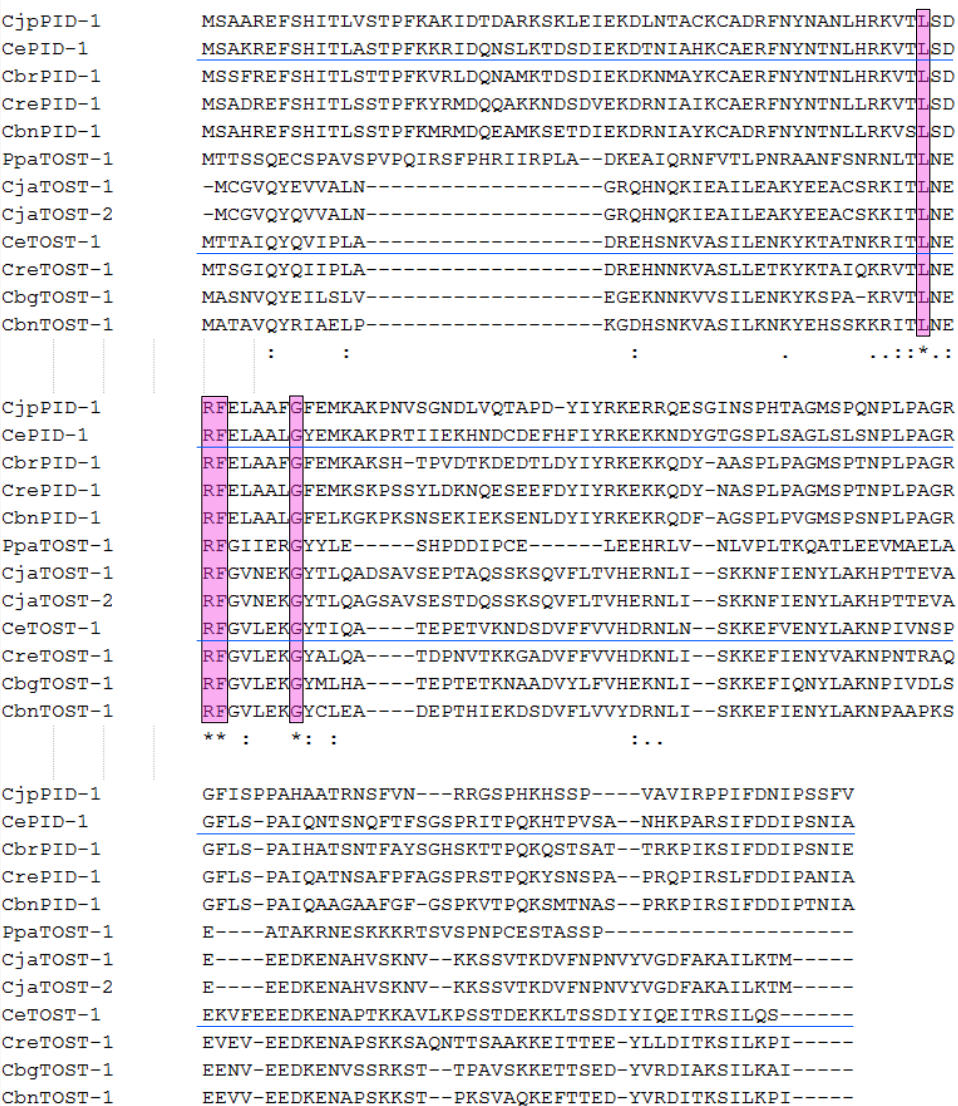

**c**

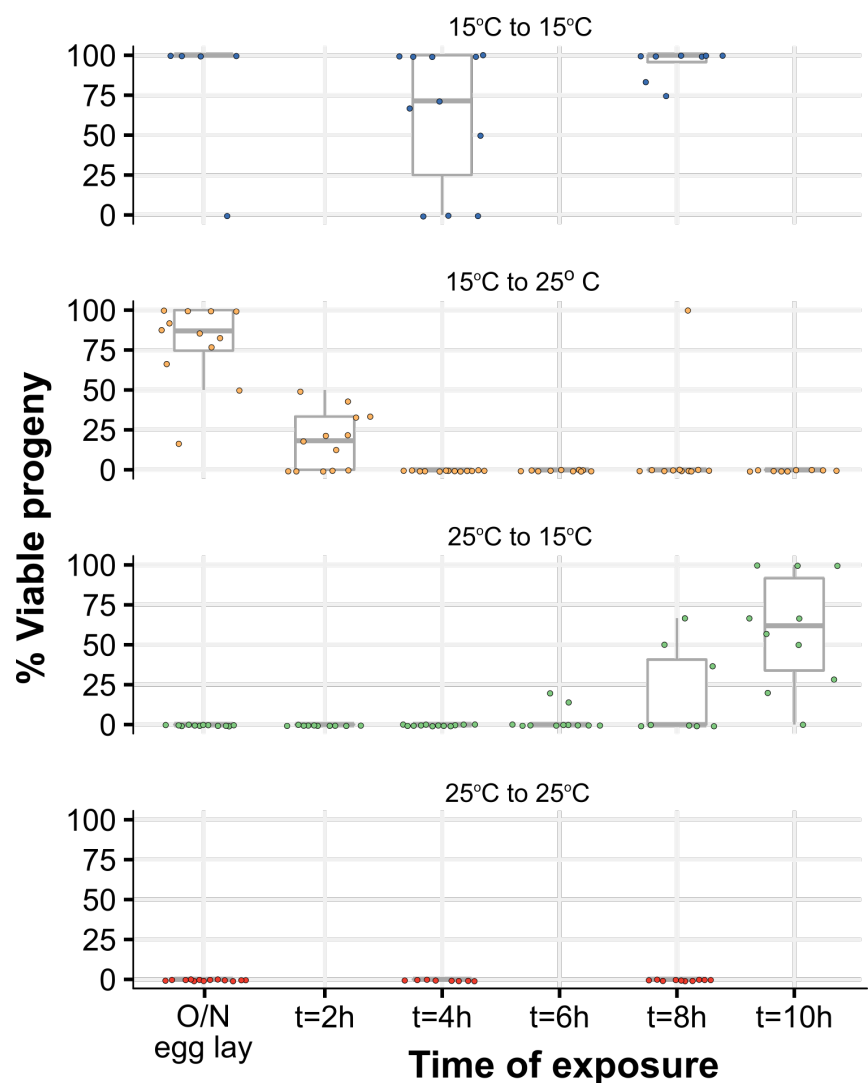

**b**

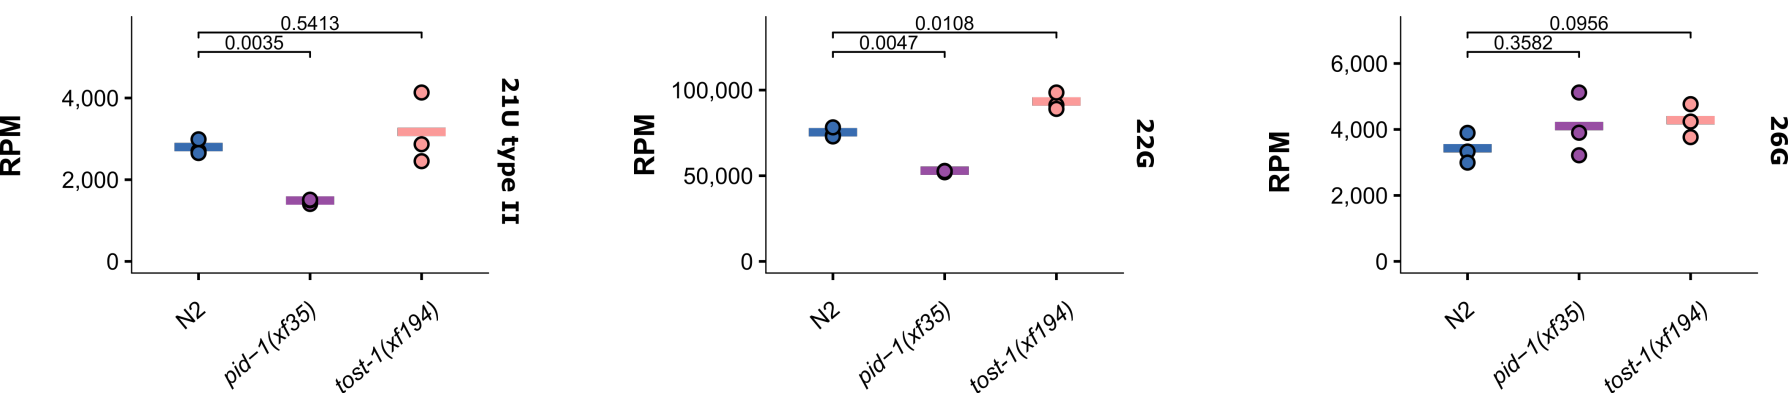

# Supplemental Figure 8

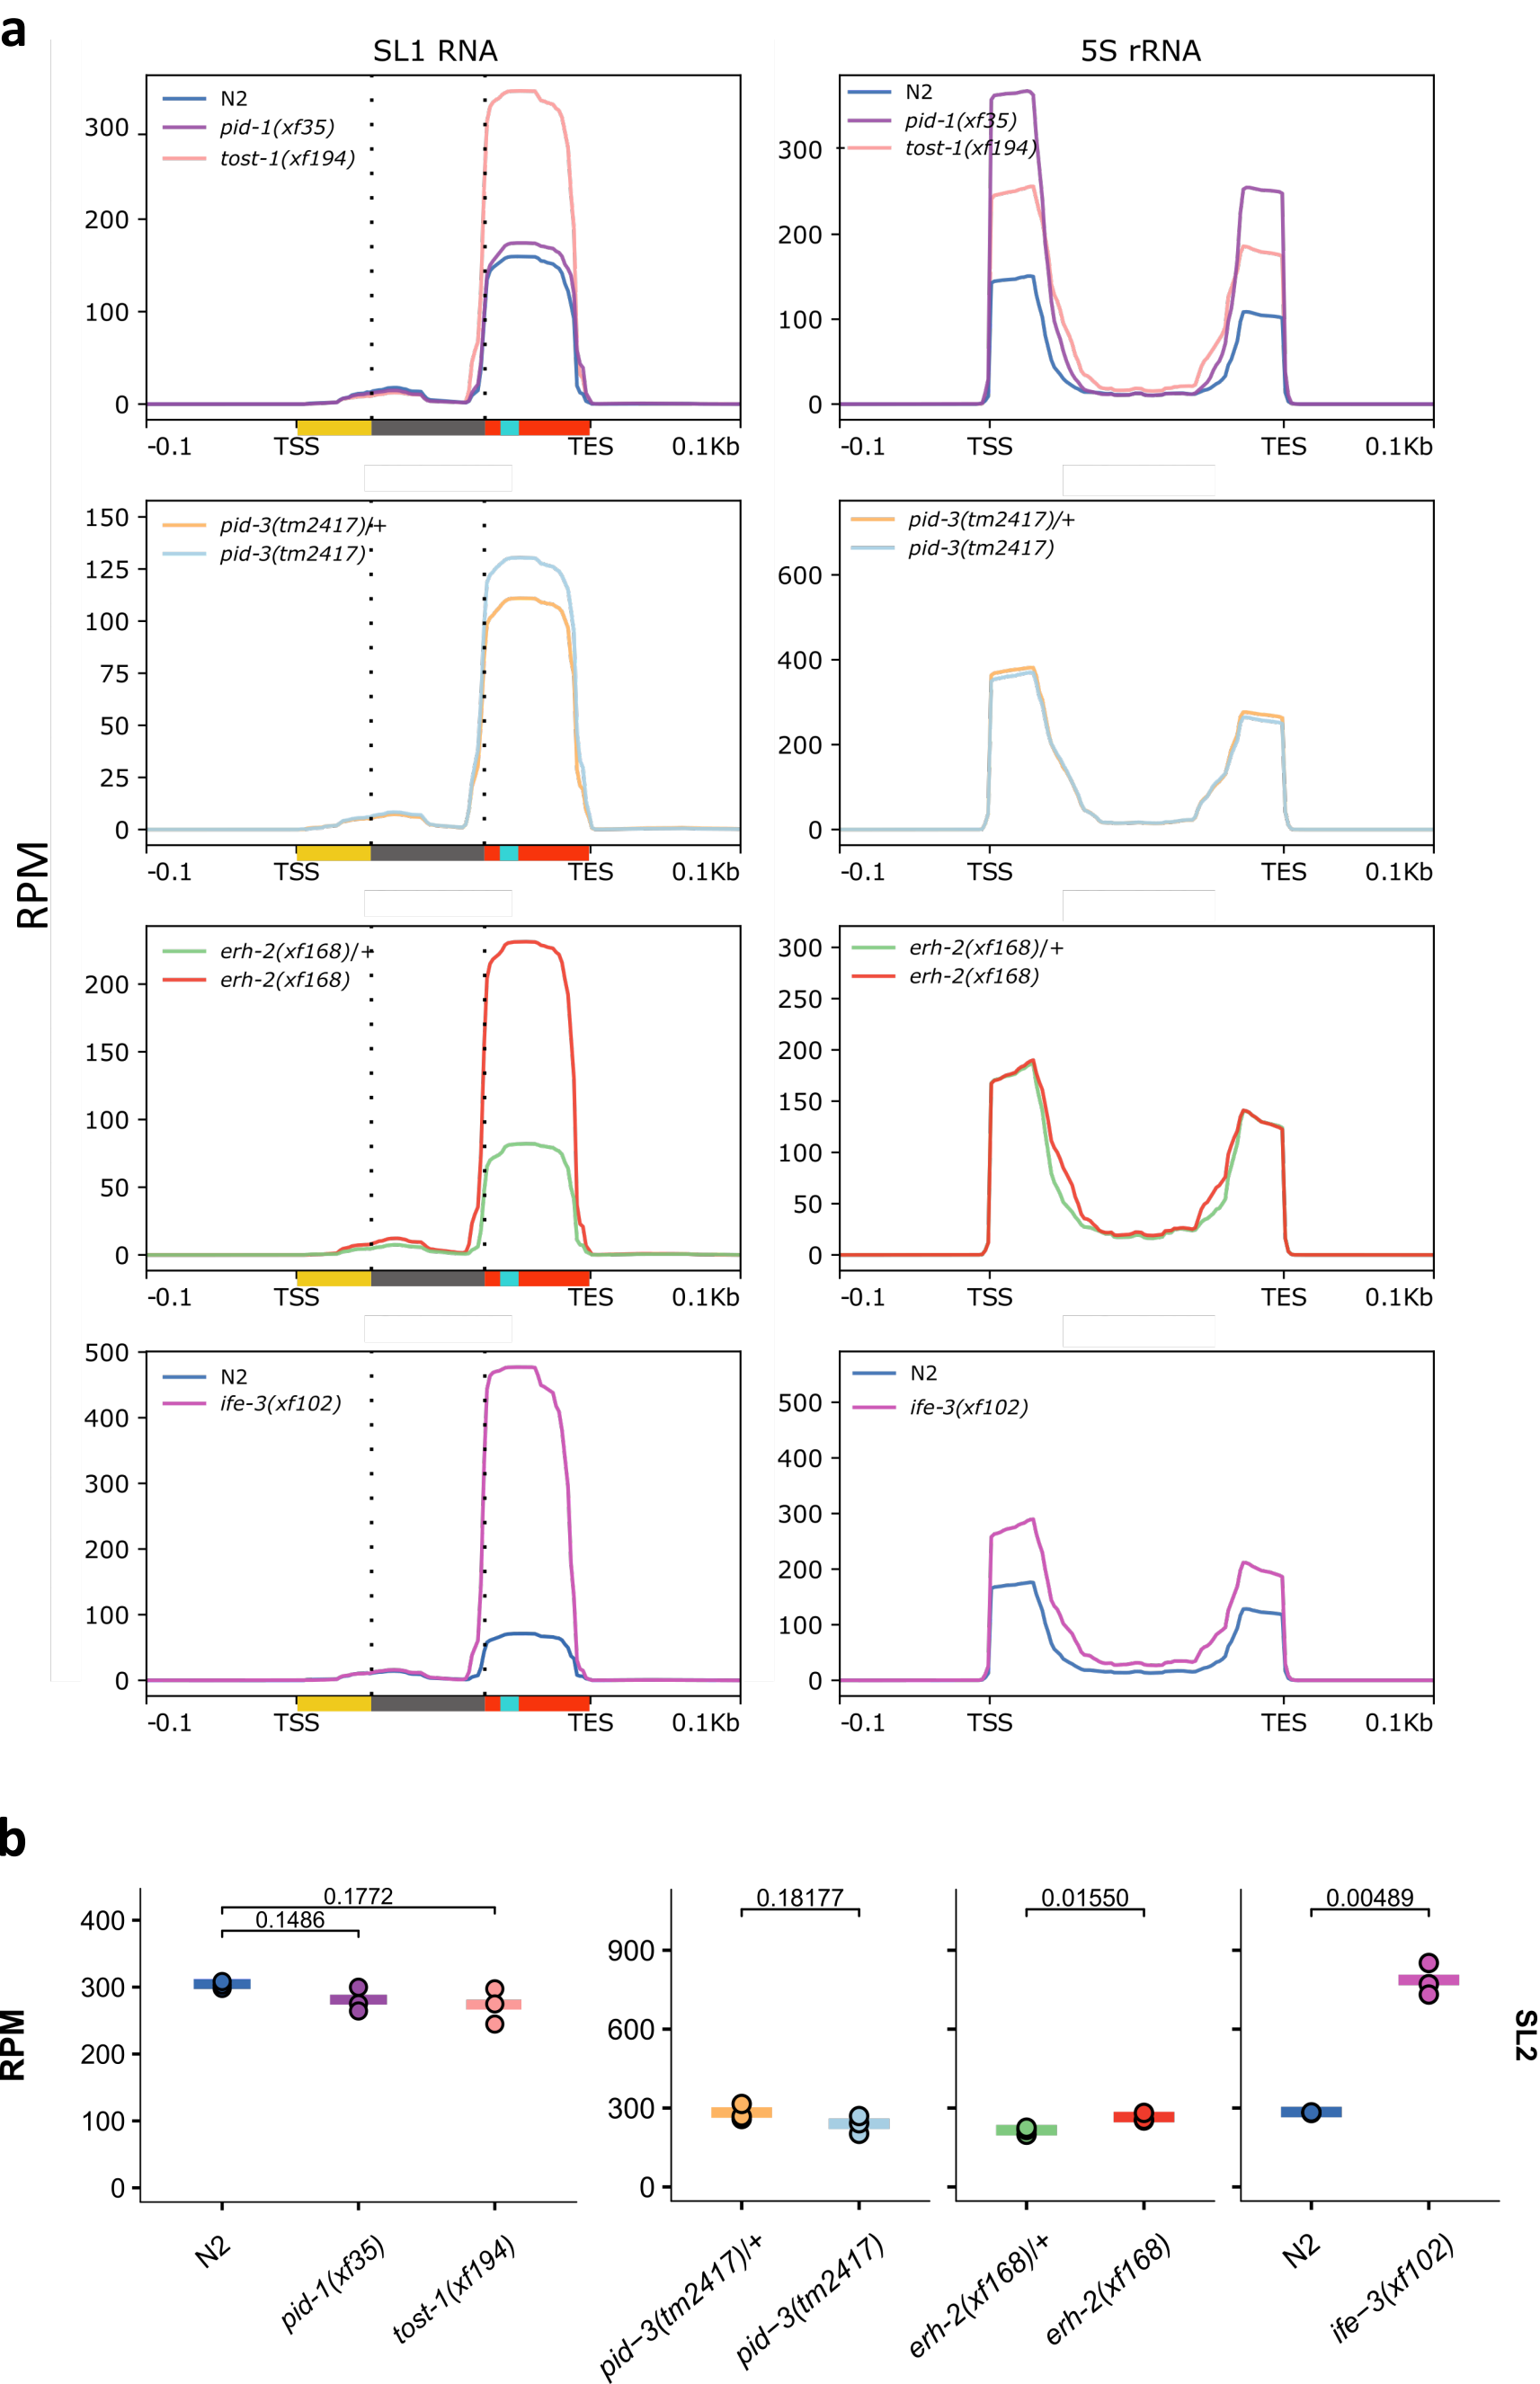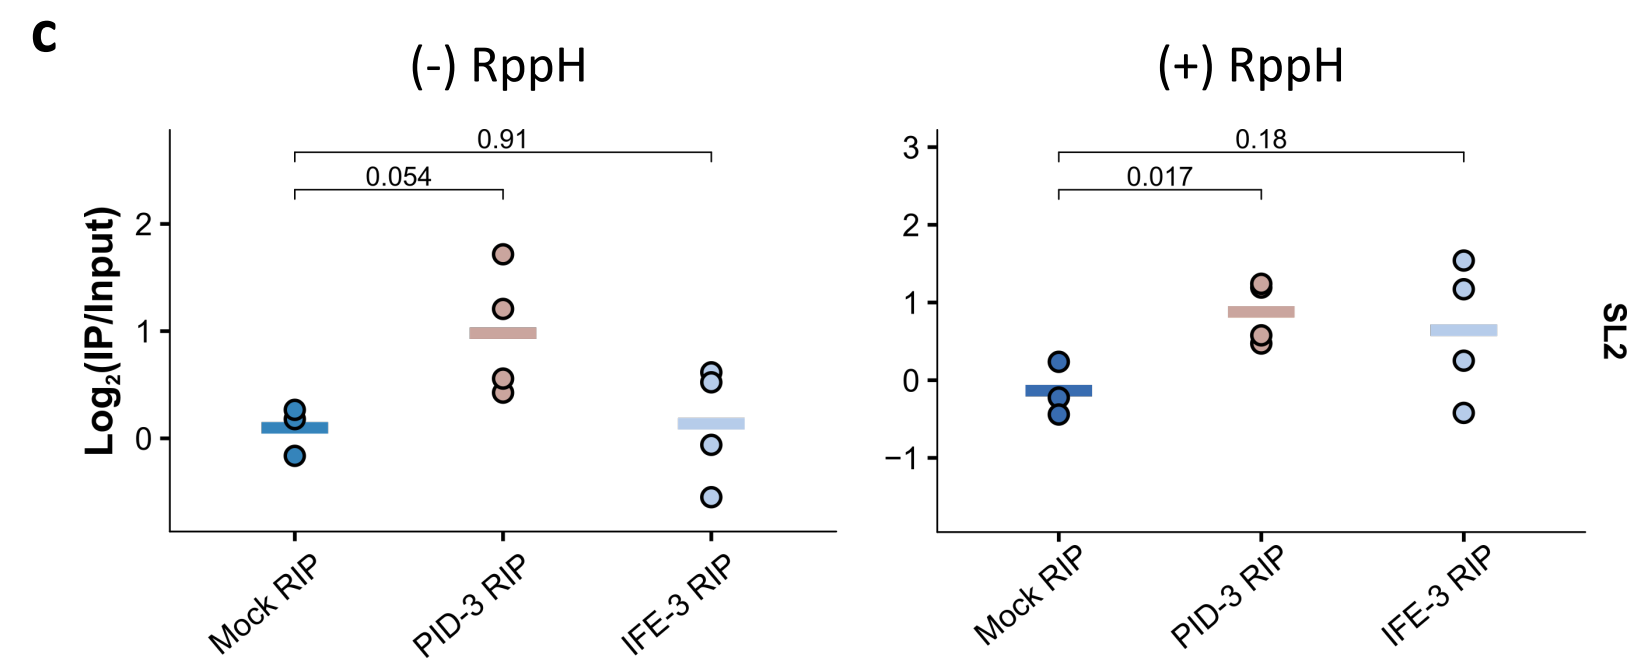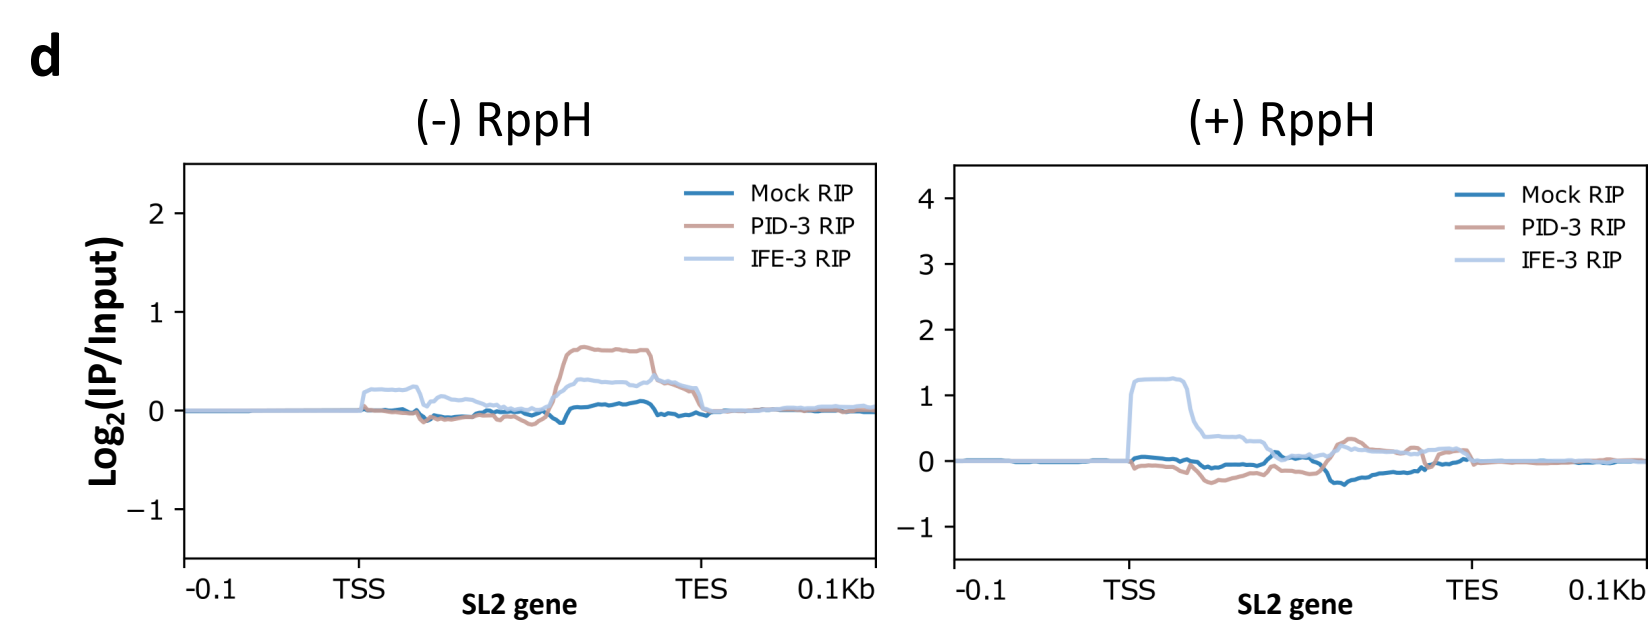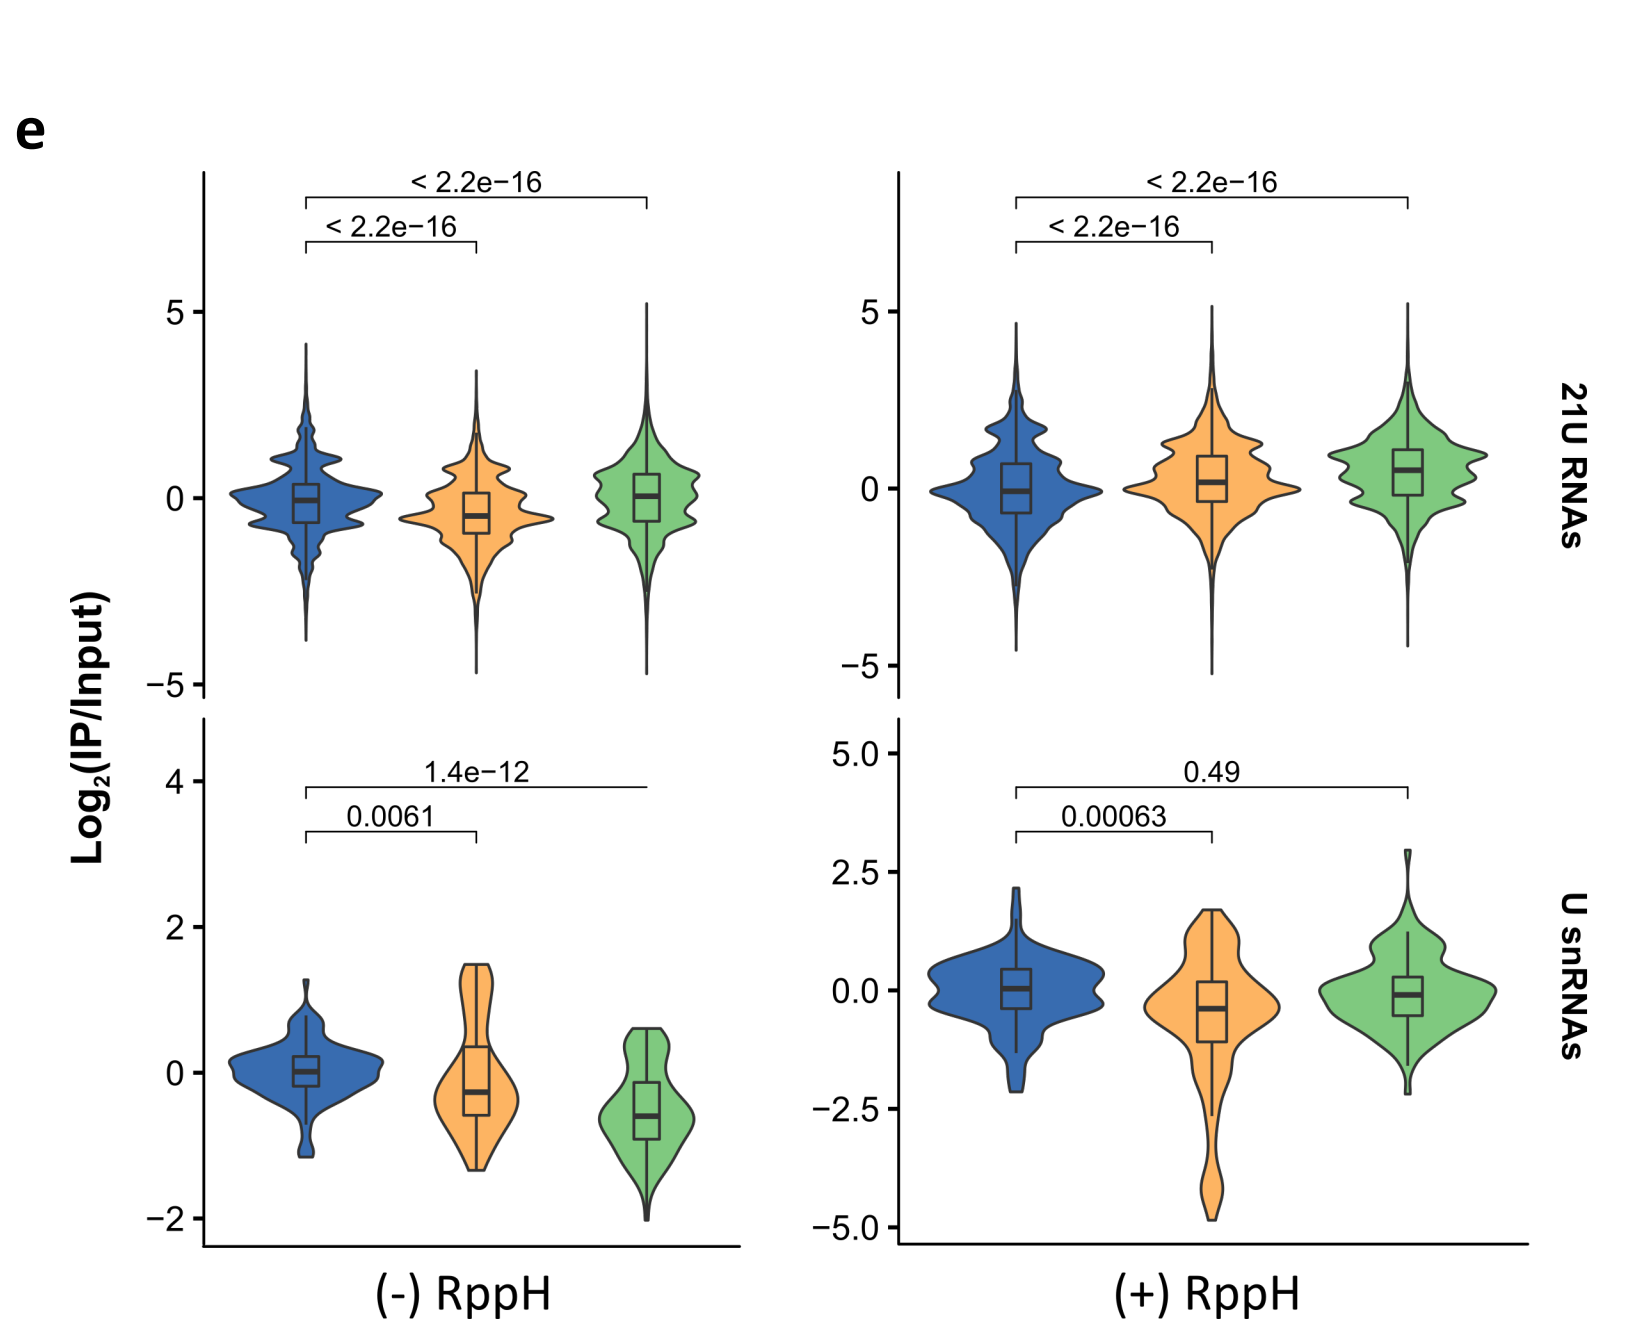

Supplement: Supplementary file [file 463711-1.pdf]
